# Supplementary material for: SLCO1B1 Variants and Statin-Induced Myopathy — A Genomewide Study
Source: Atypon-hosted journal article supplement (doi:10.1056/nejmoa0801936), 2008-07-23
Supplement: nejm_search_789sa1.pdf [file nejm_search_789sa1.pdf]

## Supplementary Appendix

This appendix has been provided by the authors to give readers additional information about their work.

Supplement to: The SEARCH Collaborative Group. *SLCO1B1* variants and statin-induced myopathy — a genomewide study. *N Engl J Med* 2008;359:789-99. DOI: 10.1056/NEJMoa0801936.

# Supplementary Appendix for: “*SLCO1B1* Variants and Statin-Induced Myopathy – A Genomewide Study”

## CONTENTS

### SEARCH Collaborative Group

### Supplementary Tables

*Supplementary Table 1:* Baseline characteristics of 85 myopathy cases and 90 matched controls in SEARCH

*Supplementary Table 2a:* Associations with myopathy for SNPs within *SLCO1B1* (+/- 10kb) from the genome-wide association study, candidate genotyping and imputation in SEARCH

*Supplementary Table 2b:* Associations with myopathy for SNPs within *CYP3A4* (+/- 10kb) with myopathy in SEARCH

*Supplementary Table 3:* LDL-cholesterol concentrations and reductions with 40mg simvastatin daily in HPS, subdivided by rs4149056 and rs2306283 *SLCO1B1* genotypes

*Supplementary Table 4:* Previous candidate gene studies of statin-induced myopathy, myalgia or intolerance (also included in Supplementary Table 5); and findings for associations of these genes with myopathy in SEARCH

*Supplementary Table 5:* Genes previously reported to be associated with statin-induced myopathy, statin intolerance or statin pharmacokinetics; and associations with SNPs in these genes (+/- 10kb) with myopathy in SEARCH

*Supplementary Table 6:* *In vivo* studies of the association between statin elimination and *SLCO1B1* rs4149056 SNP

### Supplementary Figure

*Supplementary Figure:* Trend test chi-squared values for each measured SNP versus expected values given rank (quantile-quantile plot)

### Supplementary Methods

#### *Supplementary Methods*

*Supplementary Methods Table 1a:* Oligonucleotides used for resequencing *SLCO1B1* gene

*Supplementary Methods Table 1b:* Oligonucleotides used for resequencing *CYP3A4* gene

### Supplementary Appendix References

## SEARCH Collaborative Group

### Steering Committee

T Meade and P Sleight (co-chairs); R Collins and J Armitage (study coordinators); S Parish (statistician); J Barton, C Bray and E Wincott (administrative coordinators); L Bowman, R Clarke, I Graham, D Simpson, C Warlow and D Wilcken (other members); J Tobert and T Musliner (observers)

### Data Monitoring Committee

L Wilhelmsen (chair), R Doll (ex-chair; deceased), K M Fox, C Hill and P Sandercock (voting members); R Peto (non-voting statistician).

### Collaborating hospitals and investigators

*Aberdeen Royal*: J Webster, J Jamieson, A Nixon, S Lackie, J Thompson; *Addenbrooke's*: M Brown, S Blackwood, M Morgan; *Barnsley District General*: W Rhoden (deceased), B Saeed, M Houghton, A Nicholson, C Simpson, B Hoburn; *Bedford*: I Cooper, A Gallivan, E Pickerell, J Hancock, J Watkinson; *Birmingham City*: B Ryder, S Jones, W Burbridge, M Kitchen, H O'Leary, C Verow, L Meynell, L Rollinson; *Birmingham Heartlands*: S Bain, A Jones, C Jewkes, C Russon; *Bishop Auckland General*: M Bateson, P Gill, J Nicol; *Bristol Royal*: D Stansbie, G Bayly, G Andrews, M Halestrap, J Meredith; *Burnley General*: R Best, D Appleyard, R Briggs, H Wareing, K Holmes, J Holt, M Kenyon; *Castleford & Normanton*: C White, M Khalifa, D Newton, A Wass, R Watkinson; *City General, Stoke-on-Trent*: J Creamer, S Anderson, A Bethell, C Butler, M Washington, E Weston, J Machin, K Cleaver; *Conquest, Hastings*: R Wray, J Sinclair, A Van Aalst; *Coventry and Warwickshire*: M Been, R Mattu, D Bates, A Burke, L Gill, E Walton; *Cumberland*: M Cowley, H Robson, A Graham, G Rose, M Kerr, J Mallinson, B Peascod; *Derbyshire Royal*: J Kalk, A Scott, R Donnelly, T Gibson, J Hannah, L Henshaw, M Margetts, N Pearson, S Frost, S Murray; *Derriford*: A Marshall, J Went, A Inman, J Simmonds, A Teasdale; *Dewsbury*: T Kemp, G Roberts; *Ealing*: J Kooner, S Cahill, M Lloyd, O Molloy, J Wrigley, M Galvin, C Wilder; *Edinburgh Royal*: C Swainson, R Lindley, S Shaw, L Hillis, J Johnston, D Miller, M Kennedy; *Fairfield, Bury*: S Mushahwar, M Savage, D Appleyard, G Ayer, J Schofield, S Greenhalgh, J Parks, S Speak; *Frenchay, Bristol*: C Coulson, M Papouchado, R Carpenter, J Wisby; *Glasgow Royal*: S Cobbe, C Campbell, J Hunter, H Young, M Gallacher; *Gloucestershire Royal*: D Lindsay, A Halliday, S Godfrey, L O'Donahoo; *Guy's & St Thomas'*: J Chambers, A Wierzbicki, A Jones, D Parkin, K Nwafor; *Hairmyres, Glasgow*: B Vallance, K Oldroyd, N Cunningham, G Moreland, C Oldroyd, H Young, M Crawford; *Hillingdon*: R Hillson, K Knott, N Mahabir, A Crouch, Y MacDonald; *HM Stanley, St Asaph*: J Green, L Brown, J Heron, N Jones, M Roberts, D Hainsworth, J Williams; *Hope Hospital, Salford*: P Barnes, C Longworth, J Davidson; *Ipswich*: N Irvine, R Oliver, C Pond, M Nuttall; *King's Mill, Sutton-in-Ashfield*: R Lloyd-Mostyn, M Brown, S Blackburn, W Furnell, S Webster, L Wheatley; *Leicester General*: I Hudson, J Pohl, S Nicholson; *Leighton, Crewe*: S Mallya, M Nash, J Spruce, A Searle, A Bonner, J Leather; *Macclesfield*: E Davies, R Egdell, B Price, A Robinson, S Horton; *Manor, Walsall*: A Cunningham, P Giles, J Sidaway, L Tomlinson, E Walton, L Hawkins, J Long; *Memorial, Darlington*: J Murphy, G Brennan, M Boon, S Cassidy; *Monklands, Airdrie*: C Rodger, J Hunter, A McNeilly, G Moreland, A Radcliffe; *Monkwearmouth, Sunderland*: M Farrer, J Bluett, L Cowell, A Farrell, S Gilroy, S Warren; *Musgrove Park, Taunton*: T MacConnell, S Burtchaell, L Williams; *New Cross, Wolverhampton*: P Rylance, A Hodgson, K Kertland-Hill, L Robinson, A Smallwood, S Lomas; *Newton Hospital, St Helens*: J Ball, K Hardy, S Benbow, M Gerrard, C Langley, C Fagan; *Ninewells, Dundee*: B Green, T Pringle, H Hanna, A Mackintosh, E Watson; *North Manchester General*: J Swan, D Appleyard, D McSorland, G Thompson, C O'Neill; *North*

*Tyneside General*: R Curless, C Doig, P McKenna, J Martin, J Murdy, A Scott, S Martin; *Northampton General*: J Birkhead, J O'Donnell, S Dixon, A Hassall, E Tanqueray, D Vass, I Cosford, M Elderkin, P McKenzie; *Northern General*: T Gray, D Appleyard, N Holmshaw, A McKinnon, I Ali; *Northwick Park*: N Stephens, A Banfield, L Chester, J Wiseman, N Harrisingh, R Patel, P Thaker; *Oxford Radcliffe Hospitals*: H Watkins, J Armitage, S Beebe, J Fitzgerald, J Godden, A Lawson, H Lochhead, A Taylor, S Turner; *Peterborough*: D Rowlands, A Cooper, J Graham, S Hennessy, T Rashid, C Smith; *Pilgrim Hospital, Boston*: C Nyman, J Adams, A Hardwick, P Buck, C Pattinson, J Trigg; *Poole General*: A McLeod, S Gardner, L Haimes, S Orr, S Johns; *Princess Royal, Telford*: N Capps, A Cook, D Donaldson, C Keighley, C Stiles, S Asbridge; *Queen Elizabeth, Birmingham*: N Buller, J Hooks, C Jewkes, H Jones, R Watson, P Salt; *Queen Margaret, Dunfermline*: M Francis, D MacLeod, P Allcoat, R Stuart; *Queen's Hospital, Burton-upon-Trent*: T Reynolds, J Maiden, J Reynolds, D Murray; *Raigmore, Inverness*: R MacFadyen, L Potts, A Smith, L King; *Rotherham General*: R Muthusamy, M Jones, M Lawan, C Weston, J Nixon, L Wasnidge; *Royal Bolton*: A Hutchesson, J Evans, K Morris, M Oultram; *Royal Bournemouth*: M Armitage, R Skule, C Cope, M Page; *Royal Cornwall*: S Fleming, K Andain, M Parrett, R Soper; *Royal Devon and Exeter*: K MacLeod, K Gordon, E Green, S Havill, V Stewart, S Allen, S Henson, C Rimmer; *Royal Gwent*: J Davies, M Javed, A Norris, M Williams; *Royal Preston*: S Khan, G Dobie, J Fitton, S Gilbert, C Davenport, M Williamson; *Royal Sussex County*: R Vincent, E Joyce; *Royal United, Bath*: J Reckless, A Bishop, L Brice, R Carpenter, P Field, C Shute, D Stacey; *Russell Institute, Paisley*: I Findlay, C Campbell, J Hunter, M Gallacher; *Russells Hall*: M Labib, A Hodgson, J Sidaway, L Beddoe, J Reed; *St Helier*: J Barron, O Odemuyiwa, B Bradford, M McDonnell, L West, P Beck; *St James University, Leeds*: S Gilbey, A Clarkson, K Drury, S Hall, D Quartey, B Whittam, D Lund, L Stott; *St Luke's, Huddersfield*: H Griffiths, D Appleyard, J Fitzgerald, A Kudarenko; *St Mary's, Portsmouth*: J Watkins, S Golledge, J Pottle, S Little, B Paine, C Shears; *St Peter's, Chertsey*: M Baxter, P Wilkinson, R Chambers, C Hamper, E Hollister, H Ramsay, J Barber; T Hopkins; *Sandwell General*: L Hughes, J Elson-Whittaker, C Verow, R Lambley, C Lloyd; *Scunthorpe General*: J Dhawan, J John, D Bramley, A Catchpole, A Colecchia, M LeQuelenec, D Remington, J Wiseman, C Gray, P Anderson, R Woollass; *Singleton, Swansea*: P Thomas, C Weston, F Guy, J Lynch, R Thomas, S Coates, M Gait; *Southampton University Hospitals*: D Waller, K Elkins, M Franklin, L Moore; *Southlands*: M Signy, R Chilton, E Joyce, C Wrapson, C Wiltshire; *Stepping Hill, Stockport*: P Lewis, J Curtis, J O'Toole, S Scanlon; *Torbay*: C Carey, L Dobson, M Gould, H Mansfield, G Ranson, M Rodaway, J Germon; *Univ Hospital of Wales*: I McDowell, J Cockcroft, R Field, J Whiting; *Victoria Hospital, Blackpool*: D Roberts, M Cooper, C Davies, J Fitton, L Radford, L Ward, M Williamson; *Victoria Infirmary, Glasgow*: H McAlpine, H Dougall, L Robertson, L Scott, H Young; *Walton Centre*: P Humphrey, S Saminaden, D Watling, J Davies, L Owen; *Watford General*: M Clements, E Walker, E Atkins; *Western General, Edinburgh*: R Lindley, T Shaw, C Swainson, H MacCallum, D Markie, V Melville, L Adamson, A Johnston, E Poulkard, M Rudden; *Whipps Cross*: J Hogan, F Lie, V Badger, S Duffy, C Mitchell, E MacQueen; *Wishaw General*: R Baxter, S Campbell, L McDonald, H Wood; *Worcester Royal*: A Munro, C Pycok, J Cadwell, A Doughty, M Harvey; *Wycombe General*: S Price, M Aldersley, S Lock, P Pendrey.

### **Genotyping and sequencing (Centre National de Génotypage, Paris, France)**

Anne Boland, Marc Delepine, Ivo Gut, Simon Heath, Marc Lathrop, Doris Lechner, Fumihiko Matsuda, Diana Zelenika.

## **Coordinating Centre (Clinical Trial Service Unit, University of Oxford, UK)**

*Administrative coordinators:* J Barton, C Bray, R Dayanandan, E Wincott; *Administration:* C Anderson, J Benham, H Bojowsky, V Booker, A Brewer, G Brindley, L Cobb, M Corbett, J Crowther, S Danesh-Pour, K Edmunds, A Fortun, T Grimsey, C Harwood, D Haywood, C Hope, R Jones, S Jones, K Kidney, M King, S Knight, H Lang, Z Madgwick, C Marsden, P Marshall, C Matthews, M Matthewson, J Miller, B Moss, Y Mostefai, K Murphy, A Naughten, S Pickworth, A Radley, S Southren, S Sutherland, R Tong, M Umbrath; *Clinical support and outcome adjudication:* J Armitage, C Baigent, L Bowman, R Bulbulia, R Clarke, R Collins, T Dasgupta, R Haynes, M Landray, M Mafham, W Majoni, T Porter, K Rahimi, C Reith, K Walter; *Computing coordinators:* P Harding, M Lay, K Wallendszus; *Statistics and computing:* C Berry, D Bennett, H Bettesworth, J Booth, M Bowes, Y Bu, A Charles, P Cleverley, A Cody, J Cox, M Craig, J Emberson, N Goodwin, J Hopewell, C Hurt, E Link, P McCabe, A Munday, A Murawska, A Offer, A Palmer (deceased), S Parish, R Peto, N Prajapati, S Toichlin, A Young, A Young; *Laboratory coordinators:* S Clark, K Kourellias, M Radley; *Laboratory:* V Ambrose, M Bradley, E Bush, T Chavagnon, B Chukwurah, S Crowley, J Dunseath, K Emmens, L Fletcher, J Gordon, A Gordon, C Hickman, J Hill, M Ji, A Lee, N Luker, S Norris, H Priestley, J Sullivan, J Taylor, J Wintour, M Yeung, L Youngman; *Nurse monitors & trainers:* S Beebe, J Fitzgerald, J Godden, L Haimes, A Lawson, H Lochhead, M McDonnell, M Nash, A Robinson, A Taylor, E Walton.

## Supplementary Tables

| Baseline characteristics             | Number (%) or mean (SD) |                  |
|--------------------------------------|-------------------------|------------------|
|                                      | Cases<br>(85)           | Controls<br>(90) |
| <i>Matched characteristics</i>       |                         |                  |
| Male                                 | 61 (72%)                | 67 (74%)         |
| Amiodarone use                       | 10 (12%)                | 12 (13%)         |
| Age (years)                          | 67 (9)                  | 67 (10)          |
| eGFR (ml/min/1.73m <sup>2</sup> )    | 69.4 (17.3)             | 70.1 (17.5)      |
| <i>Other characteristics</i>         |                         |                  |
| Current smoker                       | 2 (2%)                  | 11 (12%)         |
| Body-mass Index (kg/m <sup>2</sup> ) | 27.7 (3.8)              | 27.4 (3.5)       |
| Diabetes mellitus                    | 13 (15%)                | 8 (9%)           |
| Treated hypertension                 | 39 (46%)                | 34 (38%)         |
| Cerebrovascular disease              | 7 (8%)                  | 10 (11%)         |
| Other arterial disease*              | 2 (2%)                  | 3 (3%)           |
| Total cholesterol (mmol/l)           | 4.03 (0.68)             | 4.28 (0.76)      |
| LDL-cholesterol (mmol/l)             | 2.34 (0.54)             | 2.51 (0.68)      |
| HDL-cholesterol (mmol/l)             | 1.06 (0.32)             | 1.11 (0.37)      |
| Triglycerides (mmol/l)               | 1.71 (1.03)             | 1.86 (1.42)      |
| Apolipoprotein-A <sub>1</sub> (g/l)  | 1.36 (0.20)             | 1.37 (0.22)      |
| Apolipoprotein B (g/l)               | 0.87 (0.16)             | 0.90 (0.17)      |
| Creatine kinase (IU/L)               | 135 (75)                | 139 (87)         |
| Alanine transaminase (IU/L)          | 23.6 (8.5)              | 24.8 (9.7)       |

### Supplementary Table 1: Baseline characteristics of 85 myopathy cases and 90 matched controls in SEARCH

All of these cases and controls had been allocated 80mg simvastatin daily and classified themselves as with European ancestry, with matching of controls for sex, age (3 groups), estimated glomerular filtration rate (eGFR; 3 groups) and amiodarone use at baseline. Blood factors were measured after participants had received 20mg simvastatin daily for 2 months prior to randomisation. \*Other arterial disease = history of non-coronary arterial bypass surgery or angioplasty.

Supplementary Table 2a

| Variant name                | Position | Alleles |       | Minor allele frequency |         | Trend p-value        | OR (95% CI) per minor allele | Genotyped (G)/imputed (I)* |
|-----------------------------|----------|---------|-------|------------------------|---------|----------------------|------------------------------|----------------------------|
|                             |          | Minor   | Major | Case                   | Control |                      |                              |                            |
| <b>5' Upstream sequence</b> |          |         |       |                        |         |                      |                              |                            |
| rs17387842                  | 21165584 | C       | T     | 0.13                   | 0.22    | 2 x 10 <sup>-2</sup> | 0.5 (0.3-0.9)                | I                          |
| rs327544                    | 21165757 | T       | C     | 0.04                   | 0.02    | 3 x 10 <sup>-1</sup> | 2.2 (0.5-9.1)                | I                          |
| rs12368786                  | 21165942 | A       | T     | 0.13                   | 0.22    | 2 x 10 <sup>-2</sup> | 0.5 (0.3-0.9)                | I                          |
| rs327543                    | 21166718 | A       | C     | 0.14                   | 0.07    | 4 x 10 <sup>-2</sup> | 2.1 (1.0-4.3)                | I                          |
| rs11045775                  | 21167081 | A       | G     | 0.15                   | 0.25    | 2 x 10 <sup>-2</sup> | 0.5 (0.3-0.9)                | I                          |
| rs10841751                  | 21167328 | C       | T     | 0.15                   | 0.25    | 2 x 10 <sup>-2</sup> | 0.5 (0.3-0.9)                | I                          |
| rs11045776                  | 21169459 | G       | A     | 0.15                   | 0.25    | 2 x 10 <sup>-2</sup> | 0.5 (0.3-0.9)                | I                          |
| rs16923481                  | 21169585 | G       | A     | 0.02                   | 0.03    | 8 x 10 <sup>-1</sup> | 0.8 (0.2-3.2)                | I                          |
| rs11045777                  | 21170848 | A       | G     | 0.13                   | 0.22    | 2 x 10 <sup>-2</sup> | 0.5 (0.3-0.9)                | I                          |
| rs704166                    | 21171109 | A       | G     | 0.14                   | 0.07    | 6 x 10 <sup>-2</sup> | 1.9 (1.0-3.9)                | I                          |
| rs4149012                   | 21172826 | G       | A     | 0.02                   | 0.07    | 3 x 10 <sup>-2</sup> | 0.3 (0.1-0.9)                | I                          |
| rs852550                    | 21173034 | C       | T     | 0.14                   | 0.07    | 4 x 10 <sup>-2</sup> | 2.1 (1.0-4.3)                | G*                         |
| rs852549                    | 21173156 | T       | G     | 0.14                   | 0.07    | 4 x 10 <sup>-2</sup> | 2.1 (1.0-4.3)                | G*                         |
| rs4149013                   | 21173677 | G       | A     | 0.02                   | 0.07    | 3 x 10 <sup>-2</sup> | 0.3 (0.1-0.9)                | I                          |
| rs17328763                  | 21173837 | C       | T     | 0.13                   | 0.22    | 2 x 10 <sup>-2</sup> | 0.5 (0.3-0.9)                | I                          |
| CNG40001729                 | 21175214 | G       | C     | 0.00                   | 0.01    | 3 x 10 <sup>-1</sup> | -                            | G                          |
| CNG40001730                 | 21175277 | C       | A     | 0.14                   | 0.03    | 5 x 10 <sup>-4</sup> | 5.1 (1.9-14.0)               | G                          |
| CNG40001731                 | 21175387 | T       | A     | 0.01                   | 0.00    | 3 x 10 <sup>-1</sup> | -                            | G                          |
| <b>Intron 1</b>             |          |         |       |                        |         |                      |                              |                            |
| CNG40001732                 | 21175502 | C       | G     | 0.00                   | 0.01    | 3 x 10 <sup>-1</sup> | -                            | G                          |
| rs4149089                   | 21175894 | A       | -     | 0.15                   | 0.30    | 1 x 10 <sup>-3</sup> | 0.4 (0.2-0.7)                | G                          |
| rs12816706                  | 21183278 | G       | A     | 0.04                   | 0.02    | 5 x 10 <sup>-1</sup> | 1.6 (0.4-6.0)                | I                          |
| rs3829310                   | 21183323 | G       | A     | 0.14                   | 0.07    | 4 x 10 <sup>-2</sup> | 2.1 (1.0-4.3)                | I                          |
| rs3829307                   | 21183473 | T       | A     | 0.15                   | 0.29    | 1 x 10 <sup>-3</sup> | 0.4 (0.2-0.7)                | I                          |
| rs3829306                   | 21183547 | T       | C     | 0.02                   | 0.07    | 3 x 10 <sup>-2</sup> | 0.3 (0.1-0.9)                | G*                         |
| rs2010668                   | 21185560 | T       | G     | 0.14                   | 0.07    | 4 x 10 <sup>-2</sup> | 2.1 (1.0-4.3)                | I                          |
| <b>Intron 2</b>             |          |         |       |                        |         |                      |                              |                            |
| rs4149021                   | 21186052 | A       | G     | 0.02                   | 0.01    | 3 x 10 <sup>-1</sup> | 3.3 (0.3-31.9)               | I                          |
| rs12812795                  | 21186062 | T       | A     | 0.04                   | 0.02    | 5 x 10 <sup>-1</sup> | 1.6 (0.4-6.0)                | I                          |
| rs4149022                   | 21186879 | A       | G     | 0.15                   | 0.29    | 1 x 10 <sup>-3</sup> | 0.4 (0.2-0.7)                | I                          |
| rs11045785                  | 21187494 | A       | T     | 0.13                   | 0.22    | 2 x 10 <sup>-2</sup> | 0.5 (0.3-0.9)                | I                          |
| rs11045786                  | 21187538 | T       | C     | 0.12                   | 0.21    | 2 x 10 <sup>-2</sup> | 0.5 (0.3-0.9)                | I                          |
| rs2417954                   | 21187611 | A       | G     | 0.32                   | 0.38    | 2 x 10 <sup>-1</sup> | 0.8 (0.5-1.2)                | I                          |
| rs2417955                   | 21187742 | T       | A     | 0.32                   | 0.38    | 2 x 10 <sup>-1</sup> | 0.8 (0.5-1.2)                | I                          |
| rs10743408                  | 21187974 | C       | G     | 0.14                   | 0.07    | 4 x 10 <sup>-2</sup> | 2.1 (1.0-4.3)                | I                          |
| rs2061903                   | 21189969 | A       | G     | 0.12                   | 0.21    | 4 x 10 <sup>-2</sup> | 0.5 (0.3-0.9)                | I                          |
| rs7977197                   | 21190855 | C       | A     | 0.12                   | 0.21    | 2 x 10 <sup>-2</sup> | 0.5 (0.3-0.9)                | I                          |
| rs11045787                  | 21191269 | G       | T     | 0.12                   | 0.21    | 2 x 10 <sup>-2</sup> | 0.5 (0.3-0.9)                | I                          |
| rs11513411                  | 21194706 | A       | G     | 0.02                   | 0.07    | 2 x 10 <sup>-2</sup> | 0.3 (0.1-0.9)                | I                          |
| rs11045790                  | 21195636 | G       | A     | 0.04                   | 0.04    | 3 x 10 <sup>-2</sup> | 0.8 (0.3-2.3)                | I                          |
| rs7489119                   | 21196565 | A       | C     | 0.12                   | 0.22    | 7 x 10 <sup>-1</sup> | 0.5 (0.3-0.9)                | I                          |
| rs12372124                  | 21199483 | C       | A     | 0.12                   | 0.22    | 2 x 10 <sup>-2</sup> | 0.5 (0.3-0.9)                | I                          |
| rs11045796                  | 21199890 | G       | A     | 0.02                   | 0.07    | 2 x 10 <sup>-2</sup> | 0.3 (0.1-0.9)                | I                          |
| rs4149023                   | 21200724 | T       | G     | 0.02                   | 0.07    | 3 x 10 <sup>-2</sup> | 0.3 (0.1-0.9)                | I                          |
| rs4149024                   | 21200790 | T       | A     | 0.02                   | 0.01    | 3 x 10 <sup>-2</sup> | 3.3 (0.3-31.9)               | I                          |

**Supplementary Table 2a (continued)**

|                           |          |   |   |      |      |                    |                |    |
|---------------------------|----------|---|---|------|------|--------------------|----------------|----|
| rs11045797                | 21200981 | C | T | 0.12 | 0.22 | $2 \times 10^{-2}$ | 0.5 (0.3-0.9)  | I  |
| rs11045799                | 21202292 | C | T | 0.12 | 0.22 | $2 \times 10^{-2}$ | 0.3 (0.1-0.8)  | I  |
| rs11045800                | 21202515 | C | T | 0.04 | 0.11 | $1 \times 10^{-2}$ | 1.2 (0.7-2.0)  | I  |
| rs16923519                | 21202985 | G | A | 0.21 | 0.18 | $6 \times 10^{-1}$ | 0.3 (0.1-0.8)  | I  |
| rs11045802                | 21203587 | G | T | 0.04 | 0.11 | $1 \times 10^{-2}$ | 0.7 (0.5-1.1)  | I  |
| rs981262                  | 21203777 | A | G | 0.32 | 0.40 | $1 \times 10^{-1}$ | 2.7 (1.3-5.4)  | I  |
| rs7138177                 | 21204191 | G | A | 0.18 | 0.08 | $5 \times 10^{-3}$ | 0.7 (0.5-1.1)  | I  |
| rs7962588                 | 21204643 | G | C | 0.33 | 0.40 | $2 \times 10^{-1}$ | 0.5 (0.3-0.9)  | I  |
| rs11045805                | 21205463 | G | A | 0.12 | 0.22 | $2 \times 10^{-2}$ | 0.5 (0.3-0.9)  | I  |
| rs4149026                 | 21206682 | C | A | 0.22 | 0.35 | $1 \times 10^{-2}$ | 0.2 (0.0-0.6)  | G* |
| rs976754                  | 21206789 | G | A | 0.02 | 0.10 | $1 \times 10^{-3}$ | 0.2 (0.1-1.2)  | I  |
| rs4149028                 | 21207219 | C | T | 0.01 | 0.04 | $6 \times 10^{-2}$ | 0.9 (0.6-1.3)  | I  |
| rs4149030                 | 21207480 | A | G | 0.45 | 0.49 | $5 \times 10^{-1}$ | 0.4 (0.2-0.8)  | G* |
| rs10444413                | 21208935 | C | T | 0.08 | 0.18 | $7 \times 10^{-3}$ | 0.3 (0.2-0.6)  | I  |
| rs4149032                 | 21209058 | T | C | 0.14 | 0.34 | $3 \times 10^{-5}$ | 2.3 (1.4-3.7)  | I  |
| rs4149033                 | 21209077 | A | G | 0.36 | 0.19 | $8 \times 10^{-4}$ | 0.3 (0.2-0.6)  | I  |
| rs4149034                 | 21209189 | A | G | 0.14 | 0.34 | $3 \times 10^{-5}$ | 1.3 (0.8-1.9)  | I  |
| rs4149035                 | 21209532 | T | C | 0.44 | 0.37 | $2 \times 10^{-1}$ | 0.7 (0.2-2.0)  | I  |
| rs11045808                | 21209956 | C | G | 0.03 | 0.04 | $5 \times 10^{-1}$ | 0.7 (0.2-2.0)  | I  |
| rs2219828                 | 21210580 | A | G | 0.03 | 0.04 | $5 \times 10^{-1}$ | 0.8 (0.3-2.3)  | I  |
| rs7296796                 | 21211953 | G | A | 0.04 | 0.04 | $7 \times 10^{-1}$ | 1.1 (0.7-1.6)  | I  |
| rs7973095                 | 21212537 | T | C | 0.45 | 0.43 | $8 \times 10^{-1}$ | 0.4 (0.2-0.7)  | I  |
| rs10841753                | 21212637 | C | T | 0.08 | 0.21 | $1 \times 10^{-3}$ | 1.0 (0.5-2.2)  | I  |
| rs7139376                 | 21212696 | T | C | 0.09 | 0.09 | $1 \times 10^{-0}$ | 0.9 (0.6-1.4)  | I  |
| rs11045812                | 21212749 | T | C | 0.44 | 0.47 | $6 \times 10^{-1}$ | 0.2 (0.0-1.8)  | I  |
| rs12311454                | 21212774 | T | G | 0.01 | 0.03 | $1 \times 10^{-1}$ | 0.4 (0.2-0.8)  | I  |
| rs11045813                | 21213323 | A | G | 0.09 | 0.19 | $9 \times 10^{-3}$ | 0.3 (0.1-1.4)  | I  |
| rs11045814                | 21213479 | A | T | 0.01 | 0.04 | $9 \times 10^{-2}$ | 1.1 (0.7-1.6)  | I  |
| rs10841754                | 21213502 | T | A | 0.48 | 0.46 | $6 \times 10^{-1}$ | 0.3 (0.1-1.4)  | I  |
| rs12313639                | 21214239 | C | G | 0.01 | 0.04 | $9 \times 10^{-2}$ | 0.4 (0.2-0.8)  | I  |
| rs11045816                | 21214539 | G | A | 0.09 | 0.19 | $9 \times 10^{-3}$ | 0.9 (0.6-1.4)  | I  |
| rs17388851                | 21214823 | T | C | 0.44 | 0.47 | $6 \times 10^{-1}$ | 0.3 (0.1-1.4)  | I  |
| rs2417957                 | 21214878 | T | C | 0.01 | 0.04 | $9 \times 10^{-2}$ | 1.2 (0.8-1.9)  | I  |
| rs7136445                 | 21216015 | G | A | 0.46 | 0.40 | $3 \times 10^{-1}$ | 0.5 (0.3-0.9)  | I  |
| rs7295464                 | 21216614 | G | A | 0.07 | 0.09 | $5 \times 10^{-1}$ | 0.8 (0.3-1.7)  | G  |
| CNG40001743               | 21216745 | C | T | 0.04 | 0.01 | $4 \times 10^{-2}$ | 6.9 (0.8-58.3) | G  |
| <b>Intron 3</b>           |          |   |   |      |      |                    |                |    |
| CNG40001744               | 21217040 | A | - | 0.00 | 0.01 | $3 \times 10^{-1}$ | -              | G  |
| rs2291073                 | 21217081 | G | T | 0.02 | 0.11 | $5 \times 10^{-4}$ | 0.1 (0.0-0.5)  | G* |
| rs2291074                 | 21217216 | G | A | 0.01 | 0.04 | $9 \times 10^{-2}$ | 0.3 (0.1-1.4)  | I  |
| <b>Exon 4</b>             |          |   |   |      |      |                    |                |    |
| CNG40001739<br>(Ser85Ser) | 21218806 | C | T | 0.01 | 0.00 | $3 \times 10^{-1}$ | -              | G  |
| <b>Intron 4</b>           |          |   |   |      |      |                    |                |    |
| rs4149036                 | 21219007 | A | C | 0.38 | 0.22 | $2 \times 10^{-3}$ | 2.1 (1.3-3.3)  | I  |
| rs4149037                 | 21219478 | G | A | 0.01 | 0.04 | $9 \times 10^{-2}$ | 0.3 (0.1-1.4)  | I  |
| rs4149038                 | 21219509 | G | A | 0.38 | 0.22 | $2 \times 10^{-3}$ | 2.1 (1.3-3.3)  | G* |
| rs4149040                 | 21219691 | C | G | 0.47 | 0.44 | $6 \times 10^{-1}$ | 1.1 (0.7-1.6)  | I  |
| rs17329885                | 21219832 | C | T | 0.08 | 0.18 | $7 \times 10^{-3}$ | 0.4 (0.2-0.8)  | G* |
| rs4149041                 | 21220106 | T | G | 0.01 | 0.04 | $9 \times 10^{-2}$ | 0.3 (0.1-1.4)  | I  |
| rs964614                  | 21220657 | C | T | 0.09 | 0.09 | $1 \times 10^{-0}$ | 1.0 (0.5-2.2)  | I  |
| rs964615                  | 21220691 | T | C | 0.09 | 0.09 | $1 \times 10^{-0}$ | 1.0 (0.5-2.2)  | G* |

**Supplementary Table 2a (continued)**

|                                  |                 |          |          |             |             |                                      |                      |              |
|----------------------------------|-----------------|----------|----------|-------------|-------------|--------------------------------------|----------------------|--------------|
| <b>Exon 5</b>                    |                 |          |          |             |             |                                      |                      |              |
| rs2306283<br>(Asn130Asp)         | 21221005        | G        | A        | 0.48        | 0.44        | $5 \times 10^{-1}$                   | 1.2 (0.8-1.7)        | G*           |
| rs11045818<br>(Ser137Ser)        | 21221028        | A        | G        | 0.08        | 0.18        | $7 \times 10^{-3}$                   | 0.4 (0.2-0.8)        | G            |
| rs11045819<br>(Pro155Thr)        | 21221080        | A        | C        | 0.08        | 0.18        | $7 \times 10^{-3}$                   | 0.4 (0.2-0.8)        | G            |
| <b>Intron 5</b>                  |                 |          |          |             |             |                                      |                      |              |
| rs11045820                       | 21221258        | T        | C        | 0.08        | 0.18        | $7 \times 10^{-3}$                   | 0.4 (0.2-0.8)        | G            |
| rs4149044                        | 21221263        | T        | A        | 0.39        | 0.23        | $2 \times 10^{-3}$                   | 2.1 (1.3-3.3)        | G            |
| rs4149045                        | 21221287        | A        | G        | 0.39        | 0.23        | $2 \times 10^{-3}$                   | 2.1 (1.3-3.4)        | G            |
| rs4149046                        | 21221289        | A        | G        | 0.43        | 0.47        | $6 \times 10^{-1}$                   | 0.9 (0.6-1.3)        | G            |
| rs4149048                        | 21221618        | G        | A        | 0.38        | 0.22        | $2 \times 10^{-3}$                   | 2.1 (1.3-3.3)        | I            |
| rs4149050                        | 21222255        | C        | T        | 0.47        | 0.24        | $3 \times 10^{-5}$                   | 2.6 (1.6-4.0)        | I            |
| rs4149054                        | 21222446        | A        | G        | 0.47        | 0.24        | $3 \times 10^{-5}$                   | 2.6 (1.6-4.0)        | I            |
| <b>Exon 6</b>                    |                 |          |          |             |             |                                      |                      |              |
| <b>rs4149056<br/>(Val174Ala)</b> | <b>21222816</b> | <b>C</b> | <b>T</b> | <b>0.46</b> | <b>0.13</b> | <b><math>3 \times 10^{-9}</math></b> | <b>4.4 (2.6-7.6)</b> | <b>G</b>     |
| <b>rs4149056<br/>(Val174Ala)</b> | <b>21222816</b> | <b>C</b> | <b>T</b> | <b>0.45</b> | <b>0.13</b> | <b><math>2 \times 10^{-9}</math></b> | <b>4.5 (2.6-7.7)</b> | <b>G + I</b> |
| rs2291075<br>(Phe199Phe)         | 21222892        | T        | C        | 0.55        | 0.42        | $3 \times 10^{-4}$                   | 2.2 (1.4-3.5)        | I            |
| rs2291075<br>(Phe199Phe)         | 21222892        | T        | C        | 0.55        | 0.42        | $2 \times 10^{-2}$                   | 1.6 (1.1-2.5)        | I            |
| <b>Intron 7</b>                  |                 |          |          |             |             |                                      |                      |              |
| rs2291076                        | 21223254        | T        | C        | 0.34        | 0.46        | $3 \times 10^{-2}$                   | 0.6 (0.4-1.0)        | G            |
| rs2291077                        | 21223488        | T        | A        | 0.42        | 0.55        | $3 \times 10^{-2}$                   | 0.6 (0.4-1.0)        | G            |
| rs11045821                       | 21223690        | A        | G        | 0.08        | 0.18        | $8 \times 10^{-3}$                   | 0.4 (0.2-0.8)        | I            |
| rs4762698                        | 21224110        | A        | G        | 0.09        | 0.09        | $1 \times 10^0$                      | 1.0 (0.5-2.2)        | I            |
| rs12812279                       | 21224307        | G        | A        | 0.08        | 0.18        | $8 \times 10^{-3}$                   | 0.4 (0.2-0.8)        | I            |
| rs4149058                        | 21224481        | G        | A        | 0.47        | 0.23        | $2 \times 10^{-5}$                   | 2.6 (1.7-4.1)        | I            |
| rs6487213                        | 21224533        | C        | T        | 0.44        | 0.54        | $7 \times 10^{-2}$                   | 0.7 (0.5-1.0)        | I            |
| rs1000691                        | 21224693        | A        | G        | 0.01        | 0.04        | $6 \times 10^{-2}$                   | 0.2 (0.0-1.5)        | I            |
| rs999278                         | 21224918        | A        | C        | 0.35        | 0.46        | $5 \times 10^{-2}$                   | 0.7 (0.4-1.0)        | I            |
| rs11045823                       | 21225012        | A        | G        | 0.08        | 0.19        | $5 \times 10^{-3}$                   | 0.4 (0.2-0.8)        | I            |
| rs11045824                       | 21225179        | T        | G        | 0.08        | 0.19        | $5 \times 10^{-3}$                   | 0.4 (0.2-0.8)        | I            |
| rs11045825                       | 21225277        | C        | T        | 0.08        | 0.19        | $5 \times 10^{-3}$                   | 0.4 (0.2-0.8)        | I            |
| rs991262                         | 21225481        | A        | G        | 0.06        | 0.08        | $5 \times 10^{-1}$                   | 0.7 (0.3-1.7)        | I            |
| rs1564370                        | 21226457        | G        | C        | 0.38        | 0.49        | $4 \times 10^{-2}$                   | 0.6 (0.4-1.0)        | I            |
| rs1463565                        | 21226648        | C        | G        | 0.47        | 0.46        | $5 \times 10^{-2}$                   | 2.7 (1.7-4.3)        | I            |
| rs2900476                        | 21227330        | C        | T        | 0.38        | 0.23        | $9 \times 10^{-6}$                   | 0.6 (0.4-1.0)        | I            |
| rs2100996                        | 21229464        | G        | A        | 0.01        | 0.49        | $4 \times 10^{-2}$                   | 0.2 (0.0-1.5)        | G*           |
| rs1120964                        | 21230957        | T        | C        | 0.15        | 0.04        | $6 \times 10^{-2}$                   | 0.4 (0.3-0.8)        | I            |
| rs11045834                       | 21232363        | T        | C        | 0.34        | 0.28        | $3 \times 10^{-3}$                   | 0.4 (0.2-0.8)        | G*           |
| <b>Intron 8</b>                  |                 |          |          |             |             |                                      |                      |              |
| rs7957274                        | 21241663        | C        | T        | 0.09        | 0.20        | $5 \times 10^{-3}$                   | 0.4 (0.2-0.8)        | G            |
| rs4149061                        | 21241935        | T        | C        | 0.40        | 0.51        | $5 \times 10^{-2}$                   | 0.7 (0.4-1.0)        | I            |
| rs4149063                        | 21242057        | T        | G        | 0.05        | 0.07        | $4 \times 10^{-1}$                   | 0.7 (0.3-1.6)        | I            |
| rs4149064                        | 21242128        | G        | A        | 0.05        | 0.07        | $5 \times 10^{-1}$                   | 0.7 (0.3-1.7)        | G*           |
| rs12302293                       | 21243214        | A        | G        | 0.02        | 0.01        | $2 \times 10^{-1}$                   | 4.4 (0.5-40.1)       | I            |
| rs12424765                       | 21243244        | C        | T        | 0.01        | 0.03        | $1 \times 10^{-1}$                   | 0.2 (0.0-1.8)        | I            |
| <b>rs1871395</b>                 | <b>21243582</b> | <b>G</b> | <b>A</b> | <b>0.45</b> | <b>0.13</b> | <b><math>4 \times 10^{-9}</math></b> | <b>4.3 (2.5-7.4)</b> | <b>I</b>     |
| <b>rs12317268</b>                | <b>21243808</b> | <b>G</b> | <b>A</b> | <b>0.45</b> | <b>0.13</b> | <b><math>4 \times 10^{-9}</math></b> | <b>4.3 (2.5-7.4)</b> | <b>I</b>     |
| rs12310977                       | 21243822        | C        | T        | 0.02        | 0.04        | $3 \times 10^{-1}$                   | 0.5 (0.1-1.8)        | I            |
| rs11045858                       | 21243938        | G        | A        | 0.09        | 0.20        | $5 \times 10^{-3}$                   | 0.4 (0.2-0.8)        | I            |

**Supplementary Table 2a (continued)**

**Intron 9**

|           |          |   |   |      |      |                    |               |   |
|-----------|----------|---|---|------|------|--------------------|---------------|---|
| rs1564365 | 21245737 | G | A | 0.06 | 0.05 | $7 \times 10^{-1}$ | 1.2 (0.5-3.1) | I |
|-----------|----------|---|---|------|------|--------------------|---------------|---|

**Intron 10**

|             |          |   |     |      |      |                    |               |   |
|-------------|----------|---|-----|------|------|--------------------|---------------|---|
| rs12427008  | 21249215 | C | T   | 0.05 | 0.08 | $4 \times 10^{-1}$ | 0.7 (0.3-1.6) | I |
| CNG40001759 | 21249941 | - | A   | 0.01 | 0.07 | $3 \times 10^{-3}$ | 0.1 (0.0-0.6) | G |
| rs4149099   | 21249964 | - | CTT | 0.44 | 0.54 | $8 \times 10^{-2}$ | 0.7 (0.5-1.0) | G |
| CNG40001761 | 21249994 | T | C   | 0.00 | 0.02 | $9 \times 10^{-2}$ | -             | G |
| CNG40001762 | 21250055 | C | T   | 0.02 | 0.00 | $2 \times 10^{-1}$ | -             | G |

**Intron 11**

|                  |                 |          |          |             |             |                                      |                      |           |
|------------------|-----------------|----------|----------|-------------|-------------|--------------------------------------|----------------------|-----------|
| rs2417967        | 21252002        | A        | G        | 0.01        | 0.04        | $9 \times 10^{-2}$                   | 0.3 (0.1-1.4)        | I         |
| rs11045863       | 21253135        | T        | C        | 0.09        | 0.20        | $5 \times 10^{-3}$                   | 0.4 (0.2-0.8)        | I         |
| <b>rs4363657</b> | <b>21259989</b> | <b>C</b> | <b>T</b> | <b>0.46</b> | <b>0.13</b> | <b><math>4 \times 10^{-9}</math></b> | <b>4.3 (2.5-7.2)</b> | <b>G*</b> |
| <b>rs2900478</b> | <b>21260064</b> | <b>A</b> | <b>T</b> | <b>0.46</b> | <b>0.13</b> | <b><math>3 \times 10^{-9}</math></b> | <b>4.3 (2.5-7.3)</b> | <b>I</b>  |
| rs4149068        | 21260458        | C        | T        | 0.01        | 0.03        | $1 \times 10^{-1}$                   | 0.2 (0.0-1.8)        | I         |
| rs4149069        | 21260593        | G        | C        | 0.42        | 0.53        | $5 \times 10^{-2}$                   | 0.7 (0.5-1.0)        | I         |
| rs4149070        | 21261150        | G        | C        | 0.03        | 0.13        | $1 \times 10^{-3}$                   | 0.2 (0.1-0.6)        | G         |
| rs4149071        | 21261231        | C        | T        | 0.03        | 0.13        | $2 \times 10^{-3}$                   | 0.2 (0.1-0.6)        | G         |
| <b>rs4149100</b> | <b>21261245</b> | <b>-</b> | <b>A</b> | <b>0.47</b> | <b>0.14</b> | <b><math>4 \times 10^{-9}</math></b> | <b>4.3 (2.5-7.4)</b> | <b>G</b>  |
| rs4149072        | 21261252        | A        | G        | 0.02        | 0.05        | $2 \times 10^{-1}$                   | 0.5 (0.2-1.6)        | G         |

**Exon 12**

|                            |          |   |   |      |      |                    |   |   |
|----------------------------|----------|---|---|------|------|--------------------|---|---|
| CNG40001756<br>(Pro525Ser) | 21261395 | T | C | 0.00 | 0.01 | $3 \times 10^{-1}$ | - | G |
| CNG40001757<br>(Gln541Leu) | 21261444 | T | A | 0.01 | 0.00 | $3 \times 10^{-1}$ | - | G |

**Intron 12**

|            |          |   |   |      |      |                    |               |    |
|------------|----------|---|---|------|------|--------------------|---------------|----|
| rs4149076  | 21262411 | C | T | 0.55 | 0.33 | $2 \times 10^{-4}$ | 2.2 (1.4-3.4) | I  |
| rs2417968  | 21263396 | C | G | 0.42 | 0.53 | $5 \times 10^{-2}$ | 0.7 (0.5-1.0) | I  |
| rs11045872 | 21263611 | G | A | 0.09 | 0.20 | $5 \times 10^{-3}$ | 0.4 (0.2-0.8) | I  |
| rs987839   | 21266105 | A | G | 0.42 | 0.53 | $5 \times 10^{-2}$ | 0.7 (0.5-1.0) | G* |

**Intron 14**

|                   |                 |          |          |             |             |                                      |                      |          |
|-------------------|-----------------|----------|----------|-------------|-------------|--------------------------------------|----------------------|----------|
| <b>rs4149081</b>  | <b>21269288</b> | <b>A</b> | <b>G</b> | <b>0.46</b> | <b>0.13</b> | <b><math>3 \times 10^{-9}</math></b> | <b>4.3 (2.5-7.3)</b> | <b>I</b> |
| rs7966613         | 21270899        | G        | A        | 0.55        | 0.33        | $2 \times 10^{-4}$                   | 2.2 (1.4-3.4)        | G*       |
| rs11045878        | 21273489        | G        | A        | 0.55        | 0.36        | $1 \times 10^{-3}$                   | 2.0 (1.3-3.1)        | I        |
| rs10841763        | 21273609        | C        | T        | 0.55        | 0.33        | $2 \times 10^{-4}$                   | 2.2 (1.4-3.4)        | G*       |
| <b>rs11045879</b> | <b>21273886</b> | <b>C</b> | <b>T</b> | <b>0.46</b> | <b>0.13</b> | <b><math>3 \times 10^{-9}</math></b> | <b>4.3 (2.5-7.3)</b> | <b>I</b> |
| rs717958          | 21273997        | G        | T        | 0.02        | 0.05        | $1 \times 10^{-1}$                   | 0.4 (0.1-1.4)        | I        |
| rs7137060         | 21274097        | T        | C        | 0.12        | 0.22        | $2 \times 10^{-2}$                   | 0.5 (0.3-0.9)        | I        |
| rs11045880        | 21274167        | C        | T        | 0.55        | 0.33        | $2 \times 10^{-4}$                   | 2.2 (1.4-3.4)        | I        |
| rs11045884        | 21275649        | C        | G        | 0.09        | 0.20        | $5 \times 10^{-3}$                   | 0.4 (0.2-0.8)        | I        |
| <b>rs7969341</b>  | <b>21276871</b> | <b>G</b> | <b>A</b> | <b>0.46</b> | <b>0.13</b> | <b><math>3 \times 10^{-9}</math></b> | <b>4.3 (2.5-7.3)</b> | <b>I</b> |
| <b>rs11045885</b> | <b>21277285</b> | <b>G</b> | <b>A</b> | <b>0.46</b> | <b>0.13</b> | <b><math>3 \times 10^{-9}</math></b> | <b>4.3 (2.5-7.3)</b> | <b>I</b> |
| rs10841767        | 21277328        | G        | A        | 0.09        | 0.20        | $5 \times 10^{-3}$                   | 0.4 (0.2-0.8)        | G*       |
| rs12371792        | 21278110        | C        | T        | 0.55        | 0.33        | $2 \times 10^{-4}$                   | 2.2 (1.4-3.4)        | I        |
| rs11045887        | 21278745        | G        | C        | 0.09        | 0.19        | $7 \times 10^{-3}$                   | 0.4 (0.2-0.8)        | I        |
| rs12829704        | 21279888        | A        | G        | 0.09        | 0.20        | $5 \times 10^{-3}$                   | 0.4 (0.2-0.8)        | I        |
| rs12830367        | 21280172        | T        | G        | 0.55        | 0.33        | $2 \times 10^{-4}$                   | 2.2 (1.4-3.4)        | I        |
| rs11045889        | 21280304        | T        | A        | 0.55        | 0.33        | $2 \times 10^{-4}$                   | 2.2 (1.4-3.4)        | I        |
| rs2199763         | 21280975        | G        | A        | 0.58        | 0.41        | $3 \times 10^{-3}$                   | 1.9 (1.2-2.8)        | I        |
| rs12578392        | 21281237        | C        | T        | 0.58        | 0.41        | $3 \times 10^{-3}$                   | 1.9 (1.2-2.8)        | I        |
| rs12371604        | 21282603        | C        | T        | 0.49        | 0.21        | $7 \times 10^{-7}$                   | 3.0 (1.9-4.7)        | I        |
| <b>rs12369881</b> | <b>21282619</b> | <b>A</b> | <b>G</b> | <b>0.46</b> | <b>0.13</b> | <b><math>3 \times 10^{-9}</math></b> | <b>4.3 (2.5-7.3)</b> | <b>I</b> |
| <b>rs12366582</b> | <b>21282875</b> | <b>G</b> | <b>A</b> | <b>0.46</b> | <b>0.13</b> | <b><math>3 \times 10^{-9}</math></b> | <b>4.3 (2.5-7.3)</b> | <b>I</b> |

**Supplementary Table 2a (continued)**

**Exon 15**

rs34671512  
(Leu643Phe) 21283243 C A 0.01 0.08 1 x10<sup>-3</sup> 0.1 (0.0-0.6) G

**Exon 15: 3' untranslated region**

CNG40001747 21283436 G T 0.03 0.01 3 x10<sup>-1</sup> 2.3 (0.4-12.8) G  
rs4149085 21283557 C T 0.00 0.01 3 x10<sup>-1</sup> - G  
rs4149087 21283829 T G 0.40 0.59 1 x10<sup>-3</sup> 0.5 (0.3-0.8) G  
rs11045891 21283839 C A 0.09 0.20 1 x10<sup>-2</sup> 0.5 (0.2-0.9) G  
rs4149088 21283853 A G 0.40 0.59 1 x10<sup>-3</sup> 0.5 (0.3-0.8) G  
CNG40001749 21283871 C T 0.01 0.00 3 x10<sup>-1</sup> - G  
CNG40001750 21283965 A G 0.01 0.01 6 x10<sup>-1</sup> 0.5 (0.0-6.0) G

**3' downstream sequence**

rs11045892 21284061 G A 0.09 0.19 1 x10<sup>-2</sup> 0.4 (0.2-0.9) G  
rs11045893 21284086 C T 0.09 0.20 5 x10<sup>-3</sup> 0.4 (0.2-0.8) I  
rs12372157 21284285 G T 0.58 0.40 2 x10<sup>-3</sup> 1.9 (1.2-2.8) I  
rs12370842 21284853 A G 0.09 0.19 1 x10<sup>-2</sup> 0.4 (0.2-0.8) I  
rs10841769 21286286 G A 0.41 0.52 7 x10<sup>-2</sup> 0.7 (0.5-1.0) I  
rs7960688 21287136 C G 0.09 0.19 7 x10<sup>-3</sup> 0.4 (0.2-0.8) I  
rs7960384 21287175 G A 0.09 0.19 7 x10<sup>-3</sup> 0.4 (0.2-0.8) I  
rs11045900 21290186 G A 0.58 0.40 2 x10<sup>-3</sup> 1.9 (1.2-2.8) I  
rs11045901 21290488 C T 0.58 0.40 2 x10<sup>-3</sup> 1.9 (1.2-2.8) I  
rs12372067 21292800 A C 0.58 0.40 2 x10<sup>-3</sup> 1.9 (1.2-2.8) I  
rs12372111 21292943 T G 0.58 0.40 2 x10<sup>-3</sup> 1.9 (1.2-2.8) I  
rs12372162 21293291 G A 0.41 0.52 7 x10<sup>-2</sup> 0.7 (0.5-1.0) I

**Supplementary Table 2a: Associations with myopathy for SNPs within *SLCO1B1* (+/- 10kb) from the genome-wide association study, candidate genotyping and imputation in SEARCH**

Based on the 85 cases and 90 controls in Supplementary Table 1. SNPs in Supplementary Tables 2a and 2b are ordered by position and labelled by their region status (according to Ensembl; November 2007: [http://www.ensembl.org/Homo\\_sapiens/exonview?db=core;transcript=ENST00000256958](http://www.ensembl.org/Homo_sapiens/exonview?db=core;transcript=ENST00000256958)). Single SNP p-values smaller than 5 x10<sup>-7</sup> are highlighted in bold. For exonic variants, the protein change is listed with the name of the variant. Allele codings are in the forward orientation (positive strand). \*Asterisks indicate genotyped variants in the Illumina panel.

| Variant name                  | Position | Alleles |       | Minor allele frequency |         | Trend p-value       | OR (95% CI) per minor allele | Genotyped (G)/imputed (I)* |
|-------------------------------|----------|---------|-------|------------------------|---------|---------------------|------------------------------|----------------------------|
|                               |          | Minor   | Major | Case                   | Control |                     |                              |                            |
| <b>3' Untranslated region</b> |          |         |       |                        |         |                     |                              |                            |
| rs2005548                     | 99184309 | A       | G     | 0.00                   | 0.01    | 3 x10 <sup>-1</sup> | -                            | I                          |
| rs6945984                     | 99186264 | G       | A     | 0.06                   | 0.08    | 5 x10 <sup>-1</sup> | 0.8 (0.4-1.7)                | I                          |
| rs2404955                     | 99191215 | T       | C     | 0.06                   | 0.08    | 7 x10 <sup>-1</sup> | 0.9 (0.4-1.8)                | I                          |
| rs12333983                    | 99192050 | T       | A     | 0.06                   | 0.08    | 7 x10 <sup>-1</sup> | 0.9 (0.4-1.8)                | I                          |
| CNG40001939                   | 99192883 | C       | T     | 0.04                   | 0.02    | 3 x10 <sup>-1</sup> | 2.4 (0.4-13.7)               | G                          |
| CNG40001938                   | 99192925 | -       | T     | 0.00                   | 0.01    | 3 x10 <sup>-1</sup> | -                            | G                          |
| CNG40001777                   | 99193009 | T       | C     | 0.07                   | 0.11    | 3 x10 <sup>-1</sup> | 0.7 (0.3-1.6)                | G                          |
| rs12721631                    | 99193363 | T       | C     | 0.04                   | 0.02    | 3 x10 <sup>-1</sup> | 2.4 (0.4-13.4)               | G                          |
| CNG40001775                   | 99193585 | C       | T     | 0.00                   | 0.01    | 3 x10 <sup>-1</sup> | -                            | G                          |
| <b>Exon 13</b>                |          |         |       |                        |         |                     |                              |                            |
| CNG40001774<br>(Pro488Thr)    | 99193741 | A       | -     | 0.00                   | 0.01    | 3 x10 <sup>-1</sup> | -                            | G                          |
| <b>Intron 12</b>              |          |         |       |                        |         |                     |                              |                            |
| CNG29950523                   | 99193843 | C       | T     | 0.01                   | 0.00    | 3 x10 <sup>-1</sup> | -                            | G                          |
| CNG29950522                   | 99193911 | G       | A     | 0.08                   | 0.10    | 5 x10 <sup>-1</sup> | 0.8 (0.3-1.9)                | G                          |
| <b>Exon 12</b>                |          |         |       |                        |         |                     |                              |                            |
| rs4986910<br>(Met445Thr)      | 99196460 | C       | T     | 0.00                   | 0.01    | 3 x10 <sup>-1</sup> | -                            | I                          |
| <b>Intron 11</b>              |          |         |       |                        |         |                     |                              |                            |
| CNG40001773                   | 99197591 | T       | C     | 0.00                   | 0.01    | 3 x10 <sup>-1</sup> | -                            | G                          |
| <b>Exon 11</b>                |          |         |       |                        |         |                     |                              |                            |
| CNG40001772<br>(Thr363Met)    | 99197765 | T       | C     | 0.01                   | 0.00    | 3 x10 <sup>-1</sup> | -                            | G                          |
| CNG40001771<br>(Val359Glu)    | 99197777 | A       | T     | 0.00                   | 0.01    | 4 x10 <sup>-1</sup> | -                            | G                          |
| <b>Intron 10</b>              |          |         |       |                        |         |                     |                              |                            |
| rs12721617                    | 99197847 | C       | A     | 0.00                   | 0.03    | 6 x10 <sup>-2</sup> | -                            | G                          |
| rs4646440                     | 99198806 | T       | C     | 0.00                   | 0.01    | 3 x10 <sup>-1</sup> | -                            | I                          |
| rs2242480                     | 99199402 | A       | G     | 0.04                   | 0.10    | 1 x10 <sup>-1</sup> | 0.4 (0.1-1.3)                | G                          |
| <b>Intron 7</b>               |          |         |       |                        |         |                     |                              |                            |
| rs4646437                     | 99203019 | T       | C     | 0.07                   | 0.10    | 4 x10 <sup>-1</sup> | 0.7 (0.3-1.7)                | G                          |
| CNG40001765                   | 99203108 | C       | T     | 0.01                   | 0.00    | 3 x10 <sup>-1</sup> | -                            | G                          |
| rs2246709                     | 99203655 | C       | T     | 0.30                   | 0.31    | 9 x10 <sup>-1</sup> | 1.0 (0.6-1.5)                | I                          |
| rs2687116                     | 99203879 | G       | T     | 0.00                   | 0.06    | 1 x10 <sup>-2</sup> | -                            | G                          |
| <b>Exon 7</b>                 |          |         |       |                        |         |                     |                              |                            |
| CNG40001763<br>(Lys209Lys)    | 99203956 | A       | G     | 0.00                   | 0.01    | 3 x10 <sup>-1</sup> | -                            | G                          |
| <b>Intron 6</b>               |          |         |       |                        |         |                     |                              |                            |
| CNG29950512                   | 99204252 | T       | C     | 0.05                   | 0.10    | 2 x10 <sup>-1</sup> | 0.5 (0.2-1.4)                | G                          |
| <b>Intron 2</b>               |          |         |       |                        |         |                     |                              |                            |
| rs2687105                     | 99214882 | T       | A     | 0.00                   | 0.04    | 2 x10 <sup>-2</sup> | -                            | I                          |
| <b>Intron 1</b>               |          |         |       |                        |         |                     |                              |                            |
| CNG40001764                   | 99215762 | -       | ATT   | 0.00                   | 0.01    | 4 x10 <sup>-1</sup> | -                            | G                          |
| rs6957392                     | 99219399 | A       | G     | 0.00                   | 0.01    | 3 x10 <sup>-1</sup> | -                            | G                          |
| <b>5' downstream sequence</b> |          |         |       |                        |         |                     |                              |                            |
| rs2740574                     | 99220032 | G       | A     | 0.00                   | 0.04    | 2 x10 <sup>-2</sup> | -                            | I                          |
| rs11773597                    | 99220387 | G       | C     | 0.04                   | 0.03    | 5 x10 <sup>-1</sup> | 1.5 (0.5-5.0)                | I                          |
| rs1851426                     | 99220872 | T       | C     | 0.00                   | 0.04    | 2 x10 <sup>-2</sup> | -                            | I                          |

**Supplementary Table 2b: Associations with myopathy for SNPs within *CYP3A4* (+/- 10kb) from candidate genotyping and imputation in SEARCH**

Genotyping based on 54 cases and 62 controls with sufficient DNA and imputation based on the 85 cases and 90 controls in Supplementary Table 1. Alleles codings are in reverse orientation (negative strand).

| rs4149056 genotype | rs2306283 genotype | No. of participants | LDL-cholesterol (mg/dL) |                            |                     | Percent (SE) reduction | Joint test for trend by genotype in % reduction (SE)                                                    |
|--------------------|--------------------|---------------------|-------------------------|----------------------------|---------------------|------------------------|---------------------------------------------------------------------------------------------------------|
|                    |                    |                     | Mean (SD) at screening  | Mean (SD) at randomisation | Mean (SE) reduction |                        |                                                                                                         |
| TT                 | AA                 | 5630                | 130.0 (31.7)            | 76.6 (25.2)                | 53.4 (0.4)          | 40.6% (0.20)           |                                                                                                         |
| TT                 | AG                 | 5211                | 130.0 (31.0)            | 76.2 (24.8)                | 53.8 (0.4)          | 40.9% (0.21)           |                                                                                                         |
| TT                 | GG                 | 1231                | 131.2 (31.0)            | 75.5 (24.0)                | 55.7 (0.8)          | 42.0% (0.42)           |                                                                                                         |
| CT                 | AA                 | 620                 | 129.6 (30.6)            | 78.6 (25.5)                | 51.1 (0.8)          | 38.8% (0.62)           | -1.28% (0.25) per rs4149056 C allele<br>[p<0.0001]<br>0.62% (0.18) per rs2306283 G allele<br>[p=0.0005] |
| CT                 | AG                 | 2516                | 131.2 (31.0)            | 78.2 (23.6)                | 53.0 (0.4)          | 39.6% (0.30)           |                                                                                                         |
| CT                 | GG                 | 1092                | 130.4 (32.1)            | 76.2 (24.8)                | 54.2 (0.8)          | 40.8% (0.46)           |                                                                                                         |
| CC                 | AA                 | 24                  | 130.0 (24.4)            | 77.0 (19.4)                | 53.0 (4.6)          | 40.3% (2.73)           |                                                                                                         |
| CC                 | AG                 | 122                 | 127.3 (31.0)            | 77.4 (26.3)                | 49.9 (1.9)          | 39.1% (1.28)           |                                                                                                         |
| CC                 | GG                 | 214                 | 130.8 (32.1)            | 78.9 (23.6)                | 51.9 (1.5)          | 39.1% (0.91)           |                                                                                                         |

**Supplementary Table 3: LDL-cholesterol concentrations and reductions with 40mg simvastatin daily in HPS, subdivided by rs4149056 and rs2306283 *SLCO1B1* genotypes**

**Supplementary Table 4**

| Previously reported studies of myopathy, myalgia and intolerance                                           |                         |                        |                                                                                       |                              |                                                |                 |                               |                                  | Findings in SEARCH case-control study                                        |                                                                                              |                                                                                              |
|------------------------------------------------------------------------------------------------------------|-------------------------|------------------------|---------------------------------------------------------------------------------------|------------------------------|------------------------------------------------|-----------------|-------------------------------|----------------------------------|------------------------------------------------------------------------------|----------------------------------------------------------------------------------------------|----------------------------------------------------------------------------------------------|
| Author                                                                                                     | Hypotheses investigated | Gene                   | Candidate gene SNP or haplotype                                                       | SNP frequency                | Statin therapy                                 | Cases/ Controls | Endpoint                      | Lowest p-value†                  | SNP (r <sup>2</sup> to reported SNP)                                         | Trend p-value                                                                                | Genotypic p-value                                                                            |
| <b>Genes with p&lt;0.05 associations (including other studies of the same gene with p&gt;0.05 results)</b> |                         |                        |                                                                                       |                              |                                                |                 |                               |                                  |                                                                              |                                                                                              |                                                                                              |
| Morimoto <sup>1,2</sup>                                                                                    | 152 SNPs in 8 genes     | <i>SLCO1B1</i>         | *15 haplotype:<br>rs4149056<br>rs2306283                                              | 0.13<br>0.39                 | pravastatin/<br>atorvastatin                   | <10/26          | Myopathy                      | <0.01                            | rs4149056<br>rs2306283                                                       | 2 x 10 <sup>-9</sup><br>5 x 10 <sup>-1</sup>                                                 | 1 x 10 <sup>-8</sup><br>5 x 10 <sup>-1</sup>                                                 |
| Hermann <sup>3</sup>                                                                                       | 9 SNPs in 3 genes       | <i>SLCO1B1</i>         | rs4149056<br>rs2306283<br>rs11045819                                                  | 0.13<br>0.39<br>0.23         | atorvastatin                                   | 13/15           | Myalgia                       | >0.05<br>>0.05<br>>0.05          | rs4149056<br>rs2306283<br>rs11045819                                         | 2 x 10 <sup>-9</sup><br>5 x 10 <sup>-1</sup><br>7 x 10 <sup>-3</sup>                         | 1 x 10 <sup>-8</sup><br>5 x 10 <sup>-1</sup><br>2 x 10 <sup>-2</sup>                         |
| Morimoto <sup>2</sup>                                                                                      | 152 SNPs in 8 genes     | <i>ABCB1/<br/>MDR1</i> | rs2032582                                                                             | 0.39                         | simvastatin/<br>atorvastatin                   | <10/26          | Myopathy                      | <0.05                            | rs6949448 (0.93)                                                             | 4 x 10 <sup>-1</sup>                                                                         | 6 x 10 <sup>-1</sup>                                                                         |
| Fiegenbaum <sup>4</sup>                                                                                    | 5 SNPs in 3 genes       | <i>ABCB1/<br/>MDR1</i> | Haplotype :<br>rs1128503 [1236T]<br>rs2032582 [2677 non-G]<br>rs1045642 [3435T]       | 0.46<br>0.49<br>0.56         | simvastatin                                    | 15/99           | Myalgia                       | <0.03                            | rs1202169 (1.00)<br>rs6949448 (0.93)<br>rs6949448 (0.52)                     | 5 x 10 <sup>-1</sup><br>4 x 10 <sup>-1</sup><br>4 x 10 <sup>-1</sup>                         | 6 x 10 <sup>-1</sup><br>6 x 10 <sup>-1</sup><br>6 x 10 <sup>-1</sup>                         |
| Hermann <sup>3</sup>                                                                                       | 9 SNPs in 3 genes       | <i>ABCB1/<br/>MDR1</i> | rs2229109 [1199A]<br>rs1128503 [1236T]<br>rs2032582 [2677 non-G]<br>rs1045642 [3435T] | 0.00<br>0.37<br>0.63<br>0.57 | atorvastatin                                   | 13/15           | Myalgia                       | >0.05<br>>0.05<br>>0.05<br>>0.05 | rs4148732 (0.38)<br>rs1202169 (1.00)<br>rs6949448 (0.93)<br>rs6949448 (0.52) | 1 x 10 <sup>+0</sup><br>5 x 10 <sup>-1</sup><br>4 x 10 <sup>-1</sup><br>4 x 10 <sup>-1</sup> | 8 x 10 <sup>-1</sup><br>6 x 10 <sup>-1</sup><br>6 x 10 <sup>-1</sup><br>6 x 10 <sup>-1</sup> |
| Frudakis <sup>5</sup>                                                                                      | 388 SNPs in 23 genes    | <i>ABCB1/<br/>MDR1</i> | rs1045642 [3435T]                                                                     | 0.46                         | atorvastatin                                   | 51/55           | Muscle events                 | >0.05                            | rs6949448 (0.52)                                                             | 4 x 10 <sup>-1</sup>                                                                         | 6 x 10 <sup>-1</sup>                                                                         |
| Frudakis <sup>5</sup>                                                                                      | 388 SNPs in 23 genes    | <i>CYP2D6</i>          | *4 haplotype :<br>rs1065852 [100T]<br>rs3892097 [1846A]                               | 0.10<br>0.18                 | atorvastatin<br>simvastatin                    | 136/296         | Muscle events                 | 0.001                            | rs764481 (NA)                                                                | 6 x 10 <sup>-1</sup>                                                                         | 7 x 10 <sup>-1</sup>                                                                         |
| Zuccaro <sup>6</sup>                                                                                       | 8 SNPs in 3 genes       | <i>CYP2D6</i>          | *4 haplotype :<br>rs1065852[100T]<br>rs3892097 [1846A]                                | 0.10<br>0.18                 | simvastatin/<br>fluvastatin                    | 17/12           | Myalgia                       | >0.05                            | rs764481 (NA)                                                                | 6 x 10 <sup>-1</sup>                                                                         | 7 x 10 <sup>-1</sup>                                                                         |
| Mulder <sup>7</sup>                                                                                        | 4 mutations in 1 gene   | <i>CYP2D6</i>          | *4 haplotype :<br>rs1065852 [100T]<br>rs3892097 [1846A]                               | 0.10<br>0.18                 | simvastatin                                    | 26/61           | Statin intolerance            | 0.0008                           | rs764481 (NA)                                                                | 6 x 10 <sup>-1</sup>                                                                         | 7 x 10 <sup>-1</sup>                                                                         |
| Oh <sup>8</sup>                                                                                            | 2 SNPs in 1 gene        | <i>COQ2</i>            | Haplotype:<br>rs4693075<br>rs6535454                                                  | 0.34<br>0.23                 | atorvastatin/<br>rosuvastatin/<br>other statin | 133/158         | Statin intolerance (myopathy) | 0.007                            | rs4693596 (1.00)<br>rs6535450 (0.70)                                         | 6 x 10 <sup>-1</sup><br>2 x 10 <sup>-1</sup>                                                 | 4 x 10 <sup>-1</sup><br>5 x 10 <sup>-1</sup>                                                 |

**Supplementary Table 4 (continued)**

|                                              |                     |                                                           |                                                                                                                                                                            |                              |                                                                                                              |         |                               |                                                                                                  |                                             |                                            |                          |
|----------------------------------------------|---------------------|-----------------------------------------------------------|----------------------------------------------------------------------------------------------------------------------------------------------------------------------------|------------------------------|--------------------------------------------------------------------------------------------------------------|---------|-------------------------------|--------------------------------------------------------------------------------------------------|---------------------------------------------|--------------------------------------------|--------------------------|
| Vladutiu <sup>9</sup>                        | 11 SNPs in 3 genes  | <i>CPT2</i><br><i>PYGM</i><br><i>AMPD1</i>                | <i>CPT2</i> :<br>P50H<br>S113L<br>Q413fs<br>R503C<br>G549D<br>R631C<br><i>PYGM</i> :<br>R49X<br>G240S<br><i>AMPD1</i> :<br>rs17602729 [Q12X]<br>P48L<br>rs34526199 [K287I] | 0.00<br><br>0.01<br><br>0.02 | atorvastatin/<br>simvastatin/<br>cerivastatin/<br>pravastatin/<br>lovastatin/<br>gemfibrozil/<br>fenofibrate | 110/248 | Statin-<br>induced<br>myalgia | <0.0001<br>(for any<br>variant<br>allele in<br><i>CPT2</i> ,<br><i>PYGM</i> or<br><i>AMPD1</i> ) | rs17108140 (NA)                             | 1 x10 <sup>-1</sup>                        | 2 x10 <sup>-1</sup>      |
| Ruano <sup>10</sup>                          | 14 SNPs in 9 genes  | <i>HTR3B</i>                                              | rs2276307                                                                                                                                                                  | 0.17                         | atorvastatin/<br>simvastatin/<br>pravastatin                                                                 | 51/144  | Myalgia                       | 0.007                                                                                            | rs2276307 (1.00)                            | 3 x10 <sup>-1</sup>                        | 6 x10 <sup>-1</sup>      |
| Ruano <sup>10</sup>                          | 14 SNPs in 9 genes  | <i>HTR7</i>                                               | rs1935349                                                                                                                                                                  | 0.12                         | atorvastatin/<br>simvastatin/<br>pravastatin                                                                 | 51/144  | Myalgia                       | 0.026                                                                                            | No SNPs in this gene in Illumina 318K panel |                                            |                          |
| <b>Genes with p&gt;0.05 association only</b> |                     |                                                           |                                                                                                                                                                            |                              |                                                                                                              |         |                               |                                                                                                  |                                             |                                            |                          |
| Morimoto <sup>2</sup>                        | 152 SNPs in 8 genes | <i>VLCAD</i> /<br><i>ACADVL</i>                           | rs2230178 [128A]                                                                                                                                                           | rare                         | pravastatin/<br>atorvastatin/<br>simvastatin                                                                 | <10/26  | Myopathy                      | >0.05                                                                                            | rs222853 (NA)                               | 4 x10 <sup>-1</sup>                        | -                        |
| Morimoto <sup>2</sup>                        | 152 SNPs in 8 genes | 3 Other inherited myopathy genes considered, not reported |                                                                                                                                                                            |                              | pravastatin/<br>atorvastatin/<br>simvastatin                                                                 | <10/26  | Myopathy                      | >0.05                                                                                            |                                             |                                            |                          |
| Morimoto <sup>2</sup>                        | 152 SNPs in 8 genes | <i>ABCC2</i> /<br><i>MRP2</i>                             | 2 SNPs (not specified)                                                                                                                                                     | ?                            | pravastatin/<br>atorvastatin/<br>simvastatin                                                                 | <10/26  | Myopathy                      | >0.05                                                                                            | rs2002042 (NA)                              | 2 x10 <sup>-1</sup>                        | 3 x10 <sup>-2</sup>      |
| Morimoto <sup>2</sup>                        | 152 SNPs in 8 genes | <i>CYP3A4</i>                                             | 1 SNP (not specified)                                                                                                                                                      | ?                            | pravastatin/<br>atorvastatin/<br>simvastatin                                                                 | <10/26  | Myopathy                      | >0.05                                                                                            | rs2740574 (NA)<br>imputed                   | 2 x10 <sup>-2</sup>                        | 5 x10 <sup>-2</sup>      |
| Fiegenbaum <sup>4</sup>                      | 5 SNPs in 3 genes   | <i>CYP3A4</i>                                             | *1b haplotype:<br>rs2740574 [-392G]                                                                                                                                        | 0.03                         | simvastatin                                                                                                  | 15/99   | Myalgia                       | >0.05                                                                                            | rs2740574 (1.00)<br>imputed                 | 2 x10 <sup>-2</sup>                        | 5 x10 <sup>-2</sup>      |
| Fiegenbaum <sup>4</sup>                      | 5 SNPs in 3 genes   | <i>CYP3A5</i>                                             | * 3 haplotype:<br>rs776746 [6986G]                                                                                                                                         | 0.91                         | simvastatin                                                                                                  | 15/99   | Myalgia                       | >0.05                                                                                            | rs776746 (1.00)                             | 4 x10 <sup>-2</sup>                        | 1 x10 <sup>-1</sup>      |
| Zuccaro <sup>6</sup>                         | 8 SNPs in 3 genes   | <i>CYP3A5</i>                                             | * 3 haplotype:<br>rs776746 [6986G]                                                                                                                                         | 0.87                         | simvastatin/<br>atorvastatin                                                                                 | 34/39   | Myalgia                       | >0.05                                                                                            | rs776746 (1.00)                             | 4 x10 <sup>-2</sup>                        | 1 x10 <sup>-1</sup>      |
| Hermann <sup>3</sup>                         | 9 SNPs in 3 genes   | <i>CYP3A5</i>                                             | *2: rs28365083 [27289A]<br>*3: rs776746 [6986G]                                                                                                                            | 0.00<br>0.93                 | atorvastatin                                                                                                 | 13/15   | Myalgia                       | >0.05                                                                                            | rs4646458 (NA)<br>rs776746 (1.00)           | 4 x10 <sup>-1</sup><br>4 x10 <sup>-2</sup> | -<br>1 x10 <sup>-1</sup> |

**Supplementary table 4 (continued)**

|                       |                                                                                                                                                                                             |               |                                                |              |                                              |        |               |                               |                                                       |                                              |                                              |
|-----------------------|---------------------------------------------------------------------------------------------------------------------------------------------------------------------------------------------|---------------|------------------------------------------------|--------------|----------------------------------------------|--------|---------------|-------------------------------|-------------------------------------------------------|----------------------------------------------|----------------------------------------------|
| Zuccaro <sup>6</sup>  | 8 SNPs in 3 genes                                                                                                                                                                           | <i>CYP2C9</i> | *2: rs1799853 [C430T]<br>*3: rs1057910 [1075C] | 0.11<br>0.07 | simvastatin/<br>fluvastatin/<br>rosuvastatin | 18/14  | Myalgia       | >0.05                         | rs2185570 (0.83)<br>rs1057910 (1.00)                  | 1 x 10 <sup>-1</sup><br>5 x 10 <sup>-3</sup> | 2 x 10 <sup>-1</sup><br>2 x 10 <sup>-2</sup> |
| Frudakis <sup>5</sup> | 388 SNPs in 23 genes: <i>CYP3A4, CYP3A7, CYP3A5, CYP2C9, CYP2E1, CYP1A1, CYP1A2, PON1, AHR, CYP2C8, CYP1B1, GSTM1, GSTP1, PON3, CYP2B6, CYP4B1, CYP2A6, HMGCR, OCA2, MVK, CYP2C19, NAT2</i> |               |                                                |              | atorvastatin                                 | 51/55  | Muscle events | >0.006 (Bonferroni-corrected) | All SNPs in these genes associated p>10 <sup>-5</sup> |                                              |                                              |
| Ruano <sup>10</sup>   | 14 SNPs in 9 genes: <i>HTR1D, HTR2A, HTR2C, HTR3A, HTR5A, HTR6, SLC6A4.</i>                                                                                                                 |               |                                                |              | atorvastatin/<br>simvastatin/<br>pravastatin | 51/144 | Myalgia       | >0.05                         | All SNPs in these genes associated p>10 <sup>-5</sup> |                                              |                                              |

**Supplementary Table 4: Previous candidate gene studies of statin-induced myopathy, myalgia or intolerance (also included in Supplementary Table 5); and findings for associations of these genes with myopathy in SEARCH**

SNP frequency from reference where provided, otherwise from HapMap CEU panel. NA = not ascertained. †No allowance for multiple hypothesis testing (unless stated). SEARCH finding given for SNP within gene with lowest p-value.

**Supplementary Table 5**

| Gene                                                              | Chr | Findings in SEARCH study |                                              |                       | Previously reported findings related to statin-induced myopathy, statin intolerance or statin pharmacokinetics                                                                                                                                                                                                                                                                                                                                                                                                                                                                                                                                                                                                                                                                                                                                                                                                                                                                                                                                                                                                                                                                                                                                                                                                                                                                                                                                                                                                                                                                                                                                                                                                                                                                                                                                                                                                                                                                                                                                                                                                                                                                                                                                                                                                                                                                                                                                                         |
|-------------------------------------------------------------------|-----|--------------------------|----------------------------------------------|-----------------------|------------------------------------------------------------------------------------------------------------------------------------------------------------------------------------------------------------------------------------------------------------------------------------------------------------------------------------------------------------------------------------------------------------------------------------------------------------------------------------------------------------------------------------------------------------------------------------------------------------------------------------------------------------------------------------------------------------------------------------------------------------------------------------------------------------------------------------------------------------------------------------------------------------------------------------------------------------------------------------------------------------------------------------------------------------------------------------------------------------------------------------------------------------------------------------------------------------------------------------------------------------------------------------------------------------------------------------------------------------------------------------------------------------------------------------------------------------------------------------------------------------------------------------------------------------------------------------------------------------------------------------------------------------------------------------------------------------------------------------------------------------------------------------------------------------------------------------------------------------------------------------------------------------------------------------------------------------------------------------------------------------------------------------------------------------------------------------------------------------------------------------------------------------------------------------------------------------------------------------------------------------------------------------------------------------------------------------------------------------------------------------------------------------------------------------------------------------------------|
|                                                                   |     | SNPs genotyped           | Lowest p-value (trend)                       | OR for lowest p-value |                                                                                                                                                                                                                                                                                                                                                                                                                                                                                                                                                                                                                                                                                                                                                                                                                                                                                                                                                                                                                                                                                                                                                                                                                                                                                                                                                                                                                                                                                                                                                                                                                                                                                                                                                                                                                                                                                                                                                                                                                                                                                                                                                                                                                                                                                                                                                                                                                                                                        |
| <b>Transport of statins into liver from intestinal cell</b>       |     |                          |                                              |                       |                                                                                                                                                                                                                                                                                                                                                                                                                                                                                                                                                                                                                                                                                                                                                                                                                                                                                                                                                                                                                                                                                                                                                                                                                                                                                                                                                                                                                                                                                                                                                                                                                                                                                                                                                                                                                                                                                                                                                                                                                                                                                                                                                                                                                                                                                                                                                                                                                                                                        |
| <i>SLCO1B1</i> / <i>SLC21A6</i><br>(Liver specific transporter-1) | 12  | 18<br>[38]               | $4 \times 10^{-9}$<br>[ $3 \times 10^{-9}$ ] | 4.3<br>[4.4]          | <ul style="list-style-type: none"> <li>The 521T&gt;C polymorphism that exists commonly in <i>SLCO1B1</i> haplotypes of *5, *15 and *15+C1007G is the key SNP that determines functional properties of these allelic proteins.<sup>11</sup></li> <li>The <i>SLCO1B1</i>*15 haplotype is associated with abnormal increase in plasma creatine kinase or severe muscle complaints in up to 10 Japanese patients taking pravastatin or atorvastatin compared to 26 control patients also receiving statins (<math>p &lt; 0.01</math>), with an OR of 11.3 (95% CI: 1.6-80.3; <math>p &lt; 0.05</math>) for possession of 1 or more *15 haplotypes.<sup>2</sup> 2 cases did not have this mutation, but 1 did have 1628T&gt;G novel mutation.<sup>1</sup></li> <li><i>SLCO1B1</i>*5 (521T&gt;C) not associated with myalgia in 13 cases and 15 controls taking atorvastatin.<sup>3</sup></li> <li><i>SLCO1B1</i>*15/*15 (n=1) reduced non-renal clearance of pravastatin in Japanese subjects compared to <i>SLCO1B1</i>*15/*1b (n=9) and <i>SLCO1B1</i>*1b/*1b(n=4).<sup>12</sup> Similar results <i>in vivo</i> for pravastatin (for *1b/*15 genotype)<sup>13</sup> and <i>in vitro</i> for pravastatin, atorvastatin and cerivastatin, but not simvastatin.<sup>11</sup></li> <li>521CC genotype (n=4) had 144% (<math>p &lt; 0.001</math>) and 61% (<math>p = 0.049</math>) greater mean area under the plasma atorvastatin concentration-time curve from 0 to 48h than those with 521TT (n=16) and 521TC (n=12) genotype respectively.<sup>14</sup> Significant differences for rosuvastatin,<sup>14,15</sup> pitavastatin<sup>16</sup> and pravastatin<sup>12,13,17-19</sup> but not for fluvastatin.<sup>18</sup> Mean area under the curve from 0 hours to infinity for simvastatin acid concentration was 162% and 221% higher, and <math>C_{max}</math> was 120% and 200% higher, for CC genotype than for TC and TT genotypes respectively (<math>P &lt; 0.001</math>). <math>C_{max}</math> of simvastatin acid occurred earlier in CC and TC genotypes than TT genotypes.<sup>20</sup></li> <li>521 CT genotype (n=20) showed smaller reduction in total cholesterol compared to TT genotype (n=44): reduction of 16.5% for CT vs 22.3% for TT (<math>p &lt; 0.05</math>).<sup>21</sup></li> <li>Pharmacokinetic interaction between simvastatin and amiodarone was not influenced by the T521C genetic polymorphism (CT n=5; TT n=7).<sup>22</sup></li> </ul> |
| <i>SLCO2B1</i>                                                    | 11  | 10                       | 0.08                                         | 5.6                   |                                                                                                                                                                                                                                                                                                                                                                                                                                                                                                                                                                                                                                                                                                                                                                                                                                                                                                                                                                                                                                                                                                                                                                                                                                                                                                                                                                                                                                                                                                                                                                                                                                                                                                                                                                                                                                                                                                                                                                                                                                                                                                                                                                                                                                                                                                                                                                                                                                                                        |
| <i>SLCO1B3</i>                                                    | 12  | 7                        | 0.008                                        | 2.5                   |                                                                                                                                                                                                                                                                                                                                                                                                                                                                                                                                                                                                                                                                                                                                                                                                                                                                                                                                                                                                                                                                                                                                                                                                                                                                                                                                                                                                                                                                                                                                                                                                                                                                                                                                                                                                                                                                                                                                                                                                                                                                                                                                                                                                                                                                                                                                                                                                                                                                        |

**Supplementary Table 5 (continued)**

| <b>Transport of statins out of liver via bile for elimination</b>            |    |    |       |     |                                                                                                                                                                                                                                                                                                                                                                                                                                                                                                                                                                                                                                                                                                                                                                                                                                                                                                                                                                                                                                                                                                                                                                                                                                                                                                                                                                                                                                                                                                            |
|------------------------------------------------------------------------------|----|----|-------|-----|------------------------------------------------------------------------------------------------------------------------------------------------------------------------------------------------------------------------------------------------------------------------------------------------------------------------------------------------------------------------------------------------------------------------------------------------------------------------------------------------------------------------------------------------------------------------------------------------------------------------------------------------------------------------------------------------------------------------------------------------------------------------------------------------------------------------------------------------------------------------------------------------------------------------------------------------------------------------------------------------------------------------------------------------------------------------------------------------------------------------------------------------------------------------------------------------------------------------------------------------------------------------------------------------------------------------------------------------------------------------------------------------------------------------------------------------------------------------------------------------------------|
| <i>ABCB1/MDR1</i>                                                            | 7  | 18 | 0.1   | 1.7 | <ul style="list-style-type: none"> <li>• 2677G&gt;A associated with abnormal increase in plasma creatine kinase or severe muscle complaints in up to 10 Japanese patients taking simvastatin or atorvastatin (p&lt;0.05) with compared to 26 control patients also receiving statins.<sup>2</sup></li> <li>• 2677non-G, 1236T and 3435T alleles less frequent in 17 adverse drug reaction cases compared to 99 controls after treatment with 20mg/d simvastatin for 6 months (p&lt;0.05).<sup>4</sup></li> <li>• G1199A, C1236T, G2677A or T and C3435T allele frequencies were not different in 13 cases with “atorvastatin-related myopathy” and 15 healthy controls (who had taken 10mg atorvastatin for 1 week without muscle symptoms). The cases had muscular side-effects related to statin therapy reported (case subjects were termed atorvastatin-induced as there was severe muscular pain on atorvastatin, rapid improvement with withdrawal of atorvastatin and repeated symptoms on rechallenge with atorvastatin).<sup>3</sup></li> <li>• C3435T no evidence of association with muscle events (myalgia; statin myopathy; other muscle-related symptoms such as weakness, cramps, spasms, soreness and twitching; CK elevation; myositis with CK elevations; and rhabdomyolysis with CK levels &gt;10xULN) in 51 cases (where the condition was attributed specifically to atorvastatin or other statin therapy by a physician) and 55 controls taking atorvastatin.<sup>5</sup></li> </ul> |
| <i>ABCC2/MRP2</i>                                                            | 10 | 7  | 0.2   | 1.4 | <ul style="list-style-type: none"> <li>• No difference in frequencies of 2 SNPs in 10 Japanese patients with abnormal increase in plasma creatine kinase or severe muscle complaints compared to 26 control patients also receiving statins.<sup>2</sup></li> </ul>                                                                                                                                                                                                                                                                                                                                                                                                                                                                                                                                                                                                                                                                                                                                                                                                                                                                                                                                                                                                                                                                                                                                                                                                                                        |
| <b>Metabolism of statins within liver to active and inactive metabolites</b> |    |    |       |     |                                                                                                                                                                                                                                                                                                                                                                                                                                                                                                                                                                                                                                                                                                                                                                                                                                                                                                                                                                                                                                                                                                                                                                                                                                                                                                                                                                                                                                                                                                            |
| <i>UGT1A1</i>                                                                | 2  | 10 | 0.05  | 1.9 | <ul style="list-style-type: none"> <li>• Association tests for 12 SNPs and 1 insertion/deletion in 33 myopathy cases and 101 controls from SEARCH found no association (2003; unpublished).</li> </ul>                                                                                                                                                                                                                                                                                                                                                                                                                                                                                                                                                                                                                                                                                                                                                                                                                                                                                                                                                                                                                                                                                                                                                                                                                                                                                                     |
| <i>UGT1A3</i>                                                                | 2  | 13 | 0.05  | 1.9 |                                                                                                                                                                                                                                                                                                                                                                                                                                                                                                                                                                                                                                                                                                                                                                                                                                                                                                                                                                                                                                                                                                                                                                                                                                                                                                                                                                                                                                                                                                            |
| <i>UGT2B7</i>                                                                | 4  | 3  | 0.9   | 1.0 |                                                                                                                                                                                                                                                                                                                                                                                                                                                                                                                                                                                                                                                                                                                                                                                                                                                                                                                                                                                                                                                                                                                                                                                                                                                                                                                                                                                                                                                                                                            |
| <i>CYP2C9</i><br>(Cytochrome P450 2D6)                                       | 10 | 13 | 0.005 | 3.7 | <ul style="list-style-type: none"> <li>• Amiodarone is a moderate inhibitor.</li> <li>• No differences in genotype frequencies between 18 cases with muscular symptoms and 14 controls taking simvastatin, fluvastatin or rosuvastatin.<sup>6</sup></li> </ul>                                                                                                                                                                                                                                                                                                                                                                                                                                                                                                                                                                                                                                                                                                                                                                                                                                                                                                                                                                                                                                                                                                                                                                                                                                             |
| <i>CYP2C19</i>                                                               | 10 | 7  | 0.01  | 2.9 |                                                                                                                                                                                                                                                                                                                                                                                                                                                                                                                                                                                                                                                                                                                                                                                                                                                                                                                                                                                                                                                                                                                                                                                                                                                                                                                                                                                                                                                                                                            |
| <i>CYP2C8</i><br>(Cytochrome P450 2C8)                                       | 10 | 7  | 0.02  | 1.8 | <ul style="list-style-type: none"> <li>• Involved with amiodarone N-deethylation in the human liver.<sup>23</sup></li> </ul>                                                                                                                                                                                                                                                                                                                                                                                                                                                                                                                                                                                                                                                                                                                                                                                                                                                                                                                                                                                                                                                                                                                                                                                                                                                                                                                                                                               |
| <i>CYP2D6</i><br>(Cytochrome P450 2D6)                                       | 22 | 2  | 0.6   | 1.1 | <ul style="list-style-type: none"> <li>• No differences in allele frequencies of *1, *4 or 2xN alleles between 18 cases of muscle pain recorded on standardised medical record review form after treatment with simvastatin or fluvastatin compared to 12 controls taking simvastatin or fluvastatin, but reduced CYP2D6 metabolism (such as with *1/*4 alleles) was associated with larger LDL cholesterol reductions with simvastatin and fluvastatin.<sup>6</sup></li> <li>• *4 allele (captured by rs1058174, rs2267446) associated (p&lt;0.001) with muscle events (myalgia, myopathy, rhabdomyolysis) in 136 cases and 296 controls previously taking simvastatin or atorvastatin.<sup>5</sup></li> <li>• *4 allele associated (p=0.0008) with statin intolerance on simvastatin in 26 cases and 61 controls.<sup>7</sup></li> </ul>                                                                                                                                                                                                                                                                                                                                                                                                                                                                                                                                                                                                                                                                 |

**Supplementary Table 5 (continued)**

| <b>Metabolism of statins within intestinal and liver cells to active and inactive metabolites</b> |    |           |        |                 |                                                                                                                                                                                                                                                                                                                                                                                                                                                                                                                                                                                                                                                                                                                                                                                         |
|---------------------------------------------------------------------------------------------------|----|-----------|--------|-----------------|-----------------------------------------------------------------------------------------------------------------------------------------------------------------------------------------------------------------------------------------------------------------------------------------------------------------------------------------------------------------------------------------------------------------------------------------------------------------------------------------------------------------------------------------------------------------------------------------------------------------------------------------------------------------------------------------------------------------------------------------------------------------------------------------|
| <i>CYP3A4</i><br>(Cytochrome P450 3A4)                                                            | 7  | 0<br>[20] | [0.01] | [not estimated] | <ul style="list-style-type: none"> <li>No association in 17 adverse drug reaction cases compared to 99 controls after treatment with 20mg/d simvastatin for 6 months.<sup>4</sup></li> <li>No difference in frequencies of 1 SNP in 10 Japanese patients with abnormal increase in plasma creatine kinase or severe muscle complaints taking simvastatin or atorvastatin compared to 26 control patients also receiving statins.<sup>2</sup></li> <li>The A-290G variant was associated with higher LDL cholesterol compared to non-variant carriers after treatment with 10mg/d atorvastatin (AA+AG vs GG p=0.04). The percentage change in LDL cholesterol after treatment was not significantly different in genotype groups (AA+AG n=332; GG n=8, p=0.113).<sup>24</sup></li> </ul> |
| <i>CYP3A5</i><br>(Cytochrome P450 3A5)                                                            | 7  | 5         | 0.04   | 3.3             | <ul style="list-style-type: none"> <li>No association in 17 adverse drug reaction cases compared to 99 controls after treatment with 20mg/d simvastatin for 6 months.<sup>4</sup></li> <li>No evidence of higher incidence of toxicity with *3 compared to *1 in 34 cases with muscular symptoms and 39 controls taking simvastatin or atorvastatin.<sup>6</sup></li> <li>*2 allele (27289C&gt;A) and *3 allele (6986G&gt;A) not associated with myalgia in 13 cases and 15 controls taking atorvastatin.<sup>3</sup></li> <li>1 year of atorvastatin/simvastatin/lovastatin associated with smaller percentage reduction (p=0.03) in total cholesterol from baseline in those with the CYP3A5*1 allele (n=7) than those with the CYP3A5*3 allele (n=39).<sup>25</sup></li> </ul>       |
| <b>Vascular genes associated with creatine kinase activity during statin therapy</b>              |    |           |        |                 |                                                                                                                                                                                                                                                                                                                                                                                                                                                                                                                                                                                                                                                                                                                                                                                         |
| <i>NOS3</i><br>(Nitric oxide synthase 3)                                                          | 7  | 4         | 0.2    | 1.3             | <ul style="list-style-type: none"> <li>Produces nitric oxide (NO) from L-arginine in endothelial cells. NO inhibits smooth muscle contraction and platelet aggregation.</li> <li>rs1799983 (D298E) associated (p=0.005) with log creatine kinase levels in 102 patients taking atorvastatin (10mg-80mg/d) or simvastatin (5mg-80mg/d).<sup>26</sup></li> </ul>                                                                                                                                                                                                                                                                                                                                                                                                                          |
| <i>AGTR1</i><br>(Angiotensin II receptor, Type 1)                                                 | 3  | 7         | 0.02   | 1.9             | <ul style="list-style-type: none"> <li>Encodes the type I receptor for angiotensin II and mediates the cardiovascular effects of angiotensin II.</li> <li>rs12695902 associated (p=0.002) with log creatine kinase levels in 102 patients taking atorvastatin (10mg-80mg/d) or simvastatin (5mg-80mg/d).<sup>26</sup></li> </ul>                                                                                                                                                                                                                                                                                                                                                                                                                                                        |
| <b>Serotonergic neurotransmission; pain perception and transduction of nociceptive stimuli</b>    |    |           |        |                 |                                                                                                                                                                                                                                                                                                                                                                                                                                                                                                                                                                                                                                                                                                                                                                                         |
| <i>HTR3B</i>                                                                                      | 11 | 9         | 0.1    | 1.4             | <ul style="list-style-type: none"> <li>Encodes homologous ligand-gated ion channels that may be involved in psychiatric disorders.</li> <li>Risk allele in rs2276307 associated (p=0.007) with 14% higher risk of myalgia in 195 patients (39 definite myalgia, 12 probable myalgia and 144 no myalgia) taking atorvastatin (10mg-80mg/d) or simvastatin (5mg-80mg/d).<sup>10</sup></li> </ul>                                                                                                                                                                                                                                                                                                                                                                                          |
| <i>HTR7</i>                                                                                       | 10 | 0         |        |                 | <ul style="list-style-type: none"> <li>Encodes a serotonin receptor that is a possible schizophrenia susceptibility factor, with additional roles in pain.</li> <li>Risk allele in rs1935349 associated (p=0.026) with 13% higher risk of myalgia in 195 patients (39 definite myalgia, 12 probable myalgia and 144 no myalgia) taking atorvastatin (10mg-80mg/d) or simvastatin (5mg-80mg/d).<sup>10</sup></li> </ul>                                                                                                                                                                                                                                                                                                                                                                  |

**Supplementary Table 5 (continued)**

| Inherited metabolic myopathies                    |    |    |      |     |                                                                                                                                                                                                                                                                                                                                                                                                                                                                         |
|---------------------------------------------------|----|----|------|-----|-------------------------------------------------------------------------------------------------------------------------------------------------------------------------------------------------------------------------------------------------------------------------------------------------------------------------------------------------------------------------------------------------------------------------------------------------------------------------|
| <i>CPT2</i><br>(carnitine palmitoyltransferase 2) | 1  | 5  | 0.1  | 1.8 | <ul style="list-style-type: none"> <li>Associated with carnitine palmitoyltransferase II deficiency.</li> <li>3.6% of 110 cases with muscle symptoms while taking statins were CPTII deficiency carriers compared to 0% of the statin-treated control group.<sup>9</sup></li> </ul>                                                                                                                                                                                     |
| <i>PYGM</i>                                       | 11 | 2  | 0.5  | 1.3 | <ul style="list-style-type: none"> <li>Associated with myophosphorylase deficiency (McArdle disease; glycogen storage disease type V).</li> <li>12.3% of 110 patients with muscle symptoms while taking statins were carriers of McArdle disease R49X mutation, 0.9% had McArdle disease compared to 0.9% in the treated controls.<sup>9</sup></li> </ul>                                                                                                               |
| <i>AMPD1</i>                                      | 1  | 4  | 0.5  | 1.2 | <ul style="list-style-type: none"> <li>Associated with myoadenylate deaminase deficiency.</li> <li>Homozygosity for mutations in this gene was found in 7 of 110 (6.5%) drug-induced myopathies, compared to 2 of 116 (1.7%) asymptomatic statin treated subjects.<sup>9</sup></li> </ul>                                                                                                                                                                               |
| <i>RYR1</i><br>(ryanodine receptor 1)             | 19 | 20 | 0.06 | 1.5 | <ul style="list-style-type: none"> <li>Primary gene responsible for central core disease, which is a congenital myopathy predisposing to susceptibility for malignant hyperthermia (pharmacogenetic disorder of skeletal muscle after exposure to anesthetics).<sup>27</sup></li> </ul>                                                                                                                                                                                 |
| <i>COQ2</i>                                       | 4  | 3  | 0.1  | 1.6 | <ul style="list-style-type: none"> <li>CoQ10 deficiency is the most common defect found in muscle. CoQ10 is essential in mitochondria for the transport of electrons through the respiratory chain.</li> <li>In a study of 133 myopathy cases compared to 158 matched controls taking statin, the OR for rs4693075 was 2.3 (1.1 to 4.8) in a recessive model (p=0.019) and 2.6 (1.3 to 5.3) for a haplotype with rs6535454 (recessive; p=0.007).<sup>8</sup></li> </ul> |
| <i>ACADVL/VLCAD</i>                               | 17 | 2  | 0.4  | 1.5 | <ul style="list-style-type: none"> <li>Inherited rhabdomyolysis gene.</li> <li>No difference in genotype frequencies in 10 Japanese patients with abnormal increases in plasma creatine kinase or severe muscle complaints taking simvastatin or atorvastatin compared to 26 control patients also receiving statins.<sup>2</sup></li> </ul>                                                                                                                            |

**Supplementary Table 5: Genes previously reported to be associated with statin-induced myopathy, statin intolerance or statin pharmacokinetics; and associations with SNPs in these genes (+/- 10kb) with myopathy in SEARCH**

**Supplementary Table 6**

| Study (population)                                                | Statin and dose    | Number of subjects | Pharmacokinetic variable                  | Mean (SD) of pharmacokinetic variable by rs4149056 genotype |                     |                      | P-value for trend or for TT vs CT or CC | % increase (95% CI) per C allele |
|-------------------------------------------------------------------|--------------------|--------------------|-------------------------------------------|-------------------------------------------------------------|---------------------|----------------------|-----------------------------------------|----------------------------------|
|                                                                   |                    |                    |                                           | TT                                                          | CT                  | CC                   |                                         |                                  |
| <b>Area under the plasma concentration-time curve (ng.h/ml)††</b> |                    |                    |                                           |                                                             |                     |                      |                                         |                                  |
| Lee 2005** <sup>15</sup> (white)                                  | Rosuvastatin 40mg  | 25+ 6+5            | Rosuvastatin AUC (0-time last obs. conc.) | 192 (75)                                                    | 204 (113)           | 416 (228)            | >0.05, <0.05                            | 39 (14, 69)                      |
| Lee 2005** <sup>15</sup> (Malay)                                  | Rosuvastatin 40mg  | 26+ 9+0            | Rosuvastatin AUC (0-time last obs. conc.) | 400 (238)                                                   | 454 (251)           |                      | Not reported                            | 14 (-27, 77)                     |
| Lee 2005** <sup>15</sup> (Chinese)                                | Rosuvastatin 40mg  | 29+ 6+0            | Rosuvastatin AUC (0-time last obs. conc.) | 485 (181)                                                   | 579 (229)           |                      | Not reported                            | 19 (-14, 66)                     |
| Lee 2005** <sup>15</sup> (Asian-Indian)                           | Rosuvastatin 40mg  | 30+ 5+0            | Rosuvastatin AUC (0-time last obs. conc.) | 348 (185)                                                   | 378 (187)           |                      | Not reported                            | 9 (-34, 79)                      |
| Pasanen 2006 <sup>20</sup> (Caucasian)                            | Simvastatin 40mg   | 16+11+4            | Simvastatin (lactone) AUC(0-∞)            | 26.4 (10.5)                                                 | 31.9 (17.6)         | 37.9 (14.7)          | Not incl as same study as next row.     |                                  |
| Pasanen 2006 <sup>20</sup> (Caucasian)                            | Simvastatin 40mg   | 16+11+4            | Simvastatin acid AUC(0-∞)                 | 16.4 (6.4)                                                  | 20.1 (10.3)         | 52.7 (12.5)          | <0.001 for CC vs TT or TC               | 61 (30,100)                      |
| Pasanen 2007 <sup>14</sup> (white)                                | Atorvastatin 20mg  | 16+12+4            | Atorvastatin AUC(0-∞)                     | 24.2 (8.6)                                                  | 36.2 (20.3)         | 59.3 (17.4)          | 0.046, <0.001                           | 54 (24 , 92)                     |
| Pasanen 2007 <sup>14</sup> (white)                                | Rosuvastatin 10mg  | 16+12+4            | Rosuvastatin AUC (0-∞)                    | 35.0 (18.1)                                                 | 55.0 (22.7)         | 56.7 (5.1)           | >0.05, 0.002                            | 35 (8, 69)                       |
| Niemi 2006 <sup>18</sup> (white)                                  | Fluvastatin 40mg   | 16+12+4            | Fluvastatin AUC(0-∞)                      | 422.7 (132.1)                                               | 479.5 (215.0)       | 503.4 (251.2)        | >0.05, p>0.05                           | 10 (-9, 34)                      |
| Niemi 2006 <sup>18</sup> (white)                                  | Pravastatin 40mg   | 16+12+4            | Pravastatin AUC (0-∞)                     | 150.3 (78.1)                                                | 164.8 (85.7)        | 287.4 (102.9)        | 0.04: CT vs CC<br>0.02: TT vs CC        | 29 (1, 66)                       |
| Niemi 2004 <sup>17</sup> (white)                                  | Pravastatin 40mg   | 28+11+2            | Pravastatin AUC(0-12)                     | 89.5(64.0)                                                  | 184.7(105.0)        | 140.1 (39.3)         | 0.003, 0.64                             | 62 (13, 132)                     |
| Mwinyi 2004† <sup>19</sup> (white)                                | Pravastatin 40mg   | 20+10+0            | Pravastatin AUC(0-6)                      | 94.7 (54.6)                                                 | 163.0 (64.6)        | -                    | 0.006                                   | 72 (16, 157)                     |
| Nishizato 2003† <sup>12</sup> (Japanese)                          | Pravastatin 10mg   | 12+10+1            | Pravastatin AUC(0-∞)                      | 50.6 (19.9)                                                 | 66.9 (21.8)         | 111.8 (0)            | Not reported                            | 38 (5, 82)                       |
| Maeda 2006† <sup>13</sup> (Japanese)                              | Pravastatin 10mg   | 12+11+0            | Pravastatin AUC(0-24)                     | 58.2 (21.4)                                                 | 55.1 (20.4)         | -                    | Not reported                            | -5 (-30, 28)                     |
| Chung 2005† <sup>16</sup> (Korean)                                | Pitavastatin 1-8mg | 13+11+0            | Dose-normalised AUC (0-∞) (ng.h/ml/mg)    | 49.6 (12.7)                                                 | 68.1(16.3)          |                      | 0.004                                   | 37 (13, 68)                      |
| <b>Overall*</b>                                                   |                    |                    | <b>% increase (95% CI) vs TT group:</b>   | <b>28 (17, 40)</b>                                          | <b>97 (64, 137)</b> | <b>Per C allele:</b> |                                         | <b>34 (25, 44)</b>               |

| <b>Elimination of statin: renal or non-renal clearance (<math>L \cdot kg^{-1} \cdot h^{-1}</math>; unless stated)</b> |                     |         |                                      |             |             |          |              |                |
|-----------------------------------------------------------------------------------------------------------------------|---------------------|---------|--------------------------------------|-------------|-------------|----------|--------------|----------------|
| Nishizato 2003† <sup>12</sup><br>(Japanese)                                                                           | Pravastatin<br>10mg | 12+10+1 | Pravastatin non-renal                | 1.88 (0.59) | 1.08 (0.34) | 0.28 (0) | Not reported | -51 (-61, -38) |
| Nishizato 2003† <sup>12</sup><br>(Japanese)                                                                           | Pravastatin<br>10mg | 12+10+1 | Pravastatin renal clearance          | 0.44 (0.09) | 0.46 (0.13) | 0.51 (0) | Not reported | 5 (-12, 24)    |
| Maeda 2006† <sup>13</sup> (Japanese)                                                                                  | Pravastatin<br>10mg | 12+11+0 | Pravastatin renal clearance<br>(L/h) | 17.1 (6.1)  | 14.6 (3.0)  | -        | Not reported | -15 (-33, 8)   |

**Supplementary Table 6: *In vivo* studies of the association between statin elimination and *SLCO1B1* rs4149056 SNP**

\* For the overall result, there was no evidence of heterogeneity between studies in log mean AUC by genotype ( $p=0.7$  for interaction term for study and number of C alleles).

\*\* SD for AUC estimated from geometric mean and confidence intervals.

† Results reported only for multi-marker haplotypes (4 of the 5 studies mentioned in Discussion of main paper). Genotype mean and SD estimated by combining the relevant haplotypes.

†† Area under the plasma concentration-time curve between time<sub>1</sub> and time<sub>2</sub> (in hours) denoted by AUC (time<sub>1</sub>-time<sub>2</sub>)

## Supplementary Figure

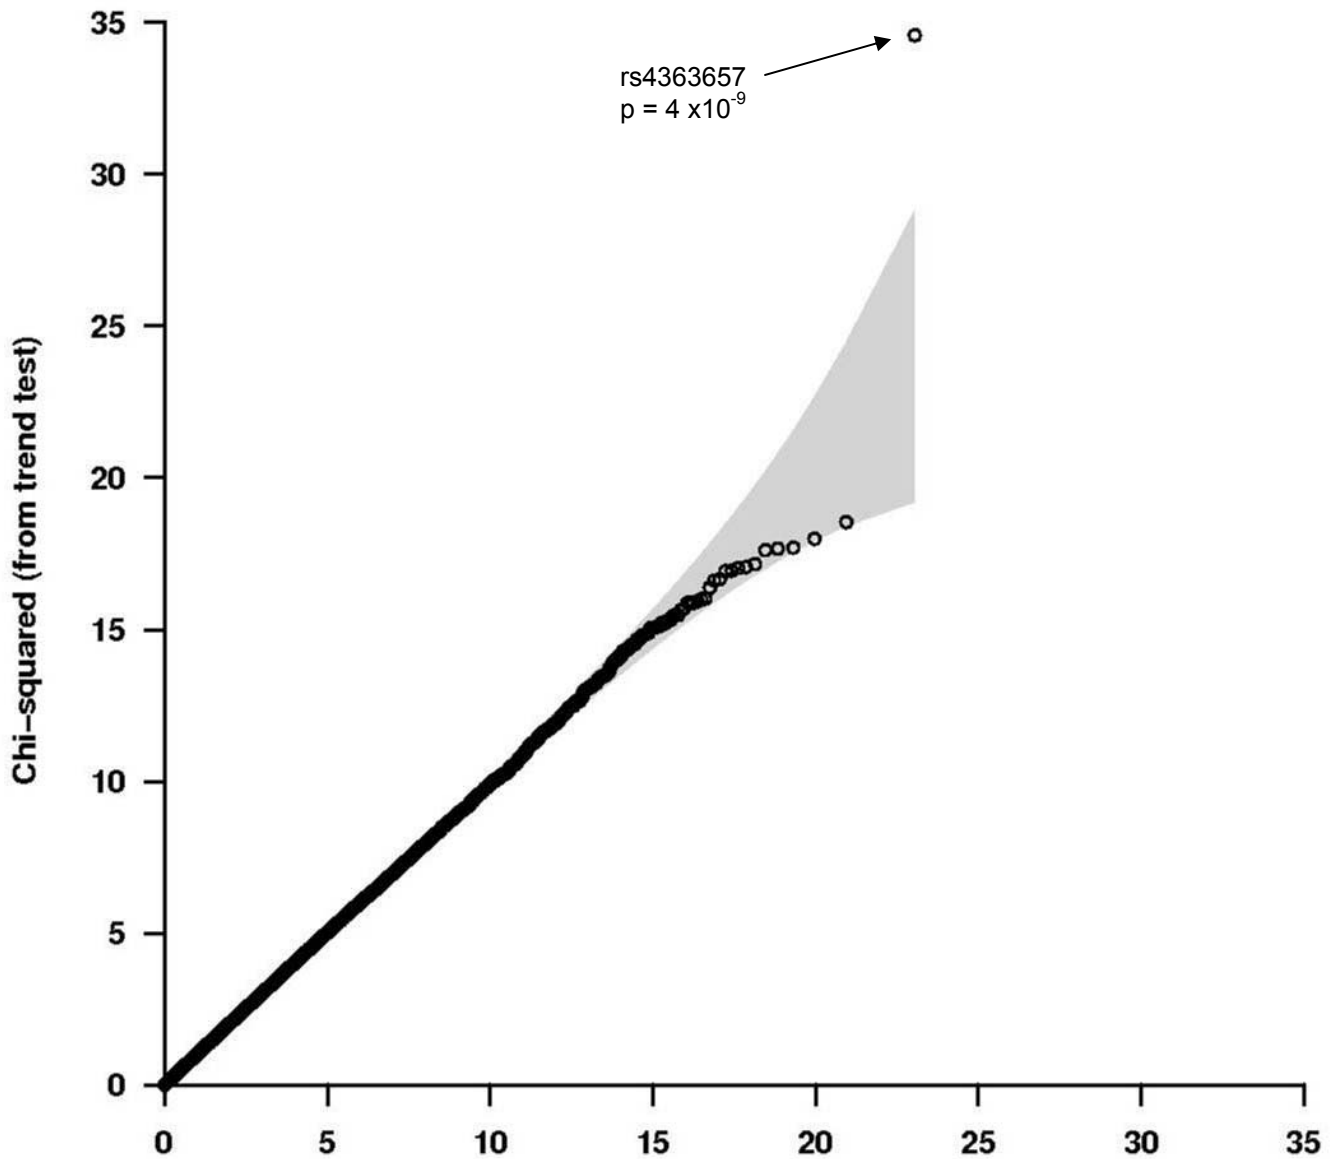

Expected value of chi-squared given its rank within the chi-squared values for all SNPs

### Supplementary Figure: Trend test chi-squared values for each measured SNP versus expected values given rank (quantile-quantile plot)

The shaded area shows the 95% confidence limits of the expected distribution under the null hypothesis of no association at any locus. A small number of points outside the bounds of the shaded area may indicate a true disease association, while inflation of the observed chi-squared statistics within the tail-end of the distribution may indicate SNP allele frequency differences between case and control groups due either to true disease association or to population substructure and artificial associations.

## Supplementary Methods

**Resequencing of *SLCO1B1* and *CYP3A4* genes:** This was performed using PCR amplicons generated by PRIMER3 to cover the whole set of exons and parts of the introns (15 fragments for *SLCO1B1*; 18 fragments for *CYP3A4*). PCR was undertaken in 8- $\mu$ L reaction volumes using 1 unit of Taq DNA polymerase (Abgene, Epsom, UK) and 20ng of genomic DNA (primer sequences in Supplementary Methods Tables 1a & b). PCR products were purified using Bio-gel P100 Gel (Bio-Rad Inc, Hercules, CA, USA) and sequenced using the Bigdye Terminator cycle sequencing chemistry method (Applied Biosystems, Palo Alto, CA, USA). Reactions were purified using Sephadex G-50 Superfine (Amersham Biosciences, Uppsala, Sweden) before applying the products to ABI 3730 DNA analysers. Detection of genetic variants was performed with the Genalys program (<http://www.cng.fr>).

**Quantile-quantile plots:** In a quantile-quantile plot, a set of independent observations  $Y=\{y_1, y_2, \dots, y_n\}$  sampled from a distribution with cumulative distribution function  $F(y)$  ( $\chi_1^2$  in the present context) is first ordered ( $y_{(1)} \leq y_{(2)} \leq \dots \leq y_{(n)}$ ) and then  $y_{(i)}$  is plotted against the expected value of  $y_{(i)}$ , which is approximated by  $F^{-1}([i-0.5]/n)$ .  $F(y_{(i)})$  follows a beta distribution, with shape parameters  $i$  and  $(n-i+1)$ .<sup>28</sup> Expected values and 95% confidence limits were calculated point by point using standard statistical functions. (This follows the approach used by the Wellcome Trust Case Control Consortium which noted that these point by point estimates may slightly underestimate the confidence limits.<sup>29</sup>) In the present genome-wide association study, comparison of the chi-squared value for each SNP versus its expected value given rank order followed the expected distribution under the null hypothesis of no association at any locus, and the median of the 316,184 chi-squared values was not statistically different from the expected value for null SNPs. Hence, it was not considered necessary to adjust the associations for genomic control by attributing extra variance in the test statistics to population substructure.<sup>30</sup>

**Cumulative and attributable myopathy risk by *rs4149056* genotype:** Simple life-table analysis of genotyped cases and controls does not suffice to estimate the cumulative myopathy risk because the controls were selected for not having developed myopathy. Instead, it was estimated as follows among the 5761 participants with European ancestry not on amiodarone at baseline who had been allocated 80mg simvastatin daily. First, the cumulative probability of still being exposed at time  $t$  was estimated from a standard Kaplan-Meier life-table analysis,<sup>31</sup> with death or stopping study 80mg simvastatin daily (defined as when supply permanently ceased) as endpoints and with censoring when any myopathy occurred (which was regarded as being prior to stopping treatment if both occurred on the same day). Denote this probability by  $e(t)$ , and define:

$p_g$  = initial proportion with each genotype ( $g$ ), taken to be in Hardy-Weinberg equilibrium, with C allele frequency of 0.146;

$n_g(t_i)$  = number of myopathy cases occurring in subjects of each genotype at each time ( $t_i$ ) that any myopathy cases occurred; and

$S_g(t)$  = probability of being free of myopathy at time  $t$ , given genotype.

Among the 5761 participants with European ancestry, 75/85 (0.882) of the myopathy cases were successfully genotyped. The cumulative myopathy risk was calculated by a life-table analysis in which the genotyped myopathy cases were the endpoints and the number of participants of genotype  $g$  at risk at time  $t_i$  were:

$$5761 \times 0.882 \times p_g \times e(t_i) \times S_g(t_{i-1})$$

Risk attributable to the genotypes CT and CC was calculated as the excess cumulative myopathy risk in these genotypes over that for the TT genotype.

**Coverage of the genome-wide screen:** Genomic coverage of the Illumina HumanHap300 panel for common SNPs (at  $r^2 \geq 0.8$ ) in people with European ancestry has been estimated in HapMap CEU samples to be 75%.<sup>32</sup> Application of this approach to the similar HumanHap300-Duo panel with allowance for the genotyping failure rate in the present study yields an estimated coverage of 74%.

**Supplementary Methods Table 1a**

| <b>Exon number</b> | <b>Name</b>     | <b>Sequence</b>          | <b>Usage</b>       |
|--------------------|-----------------|--------------------------|--------------------|
| Exon1              | SLCO1B1_P001_PF | AATGGTCTTGCAGTTAATTGGG   | PCR                |
|                    | SLCO1B1_P001_PR | TCCCTTACCCTGTATCAAACCT   | PCR                |
|                    | SLCO1B1_P001_SF | TGGCAACTGGAGTGAACCTCTT   | sequencing         |
|                    | SLCO1B1_P001_SR | TTCCCTCTACTCCCACCCTT     | sequencing         |
| Exon2              | SLCO1B1_P002_PF | TCTACTCTGTGCAAGGGGCT     | PCR                |
|                    | SLCO1B1_P002_SF | TCCAGCATTGACCTAGCAGA     | sequencing         |
|                    | SLCO1B1_P002_SR | TCGTGATCAATCCAAAACCA     | PCR and sequencing |
| Exon3              | SLCO1B1_P003_PF | TGTTTTTCAGCTGGCTTCCT     | PCR                |
|                    | SLCO1B1_P003_PR | GGTCTAACGTAGGTTGCTCTGAA  | PCR                |
|                    | SLCO1B1_P003_SF | AGAATGTACTGCCACTCCCCT    | sequencing         |
|                    | SLCO1B1_P003_SR | TATTGCCAAATTGCCTGTGA     | sequencing         |
| Exon4              | SLCO1B1_P004_PF | ATGCCATGGTTTATTCTTTTTCA  | PCR                |
|                    | SLCO1B1_P004_PR | TAAGTTTCTCCCCATGTGC      | PCR                |
|                    | SLCO1B1_P004_SF | TGTCTTTGAGGGAAGGCACT     | sequencing         |
|                    | SLCO1B1_P004_SR | GCTTCAGTGAAATGATGGGAA    | sequencing         |
| Exon5              | SLCO1B1_P005_PF | ATAACCCACTTAGCCTGGGG     | PCR                |
|                    | SLCO1B1_P005_PR | GCTGCCTGTGTGTTCTCAA      | PCR                |
|                    | SLCO1B1_P005_SF | GGGAAGATAATGGTGCAA       | sequencing         |
|                    | SLCO1B1_P005_SR | CGGCAGGTTTATCATCCAGT     | sequencing         |
| Exon6              | SLCO1B1_ex6_PF  | TTGTCAAAGTTTGCAAAGTG     | PCR and sequencing |
|                    | SLCO1B1_ex6_PR  | GCCAAGAATGCATGGTTCTT     | PCR and sequencing |
| Exon7              | SCLO1B1_P127_PF | TTGTATGATCACTTTCCCTTTGTC | PCR and sequencing |
|                    | SCLO1B1_P127_PR | CACATCAACATCCAAGCCAC     | PCR and sequencing |
| Exon8              | SLCO1B1_P007_PF | TTCATTGCTGACCCTTTCTTG    | PCR                |
|                    | SLCO1B1_P007_PR | GCATCACCCACTAGGTTCTTG    | PCR                |
|                    | SLCO1B1_P007_SF | AGCCATCAAGTGCACACAAG     | sequencing         |
|                    | SLCO1B1_P007_SR | TTTTGTTGGTTTCTCCCTGC     | sequencing         |
| Exon9              | SLCO1B1_P008_PF | AAAACAGCACTTACGTATGACCC  | PCR and sequencing |
|                    | SLCO1B1_P008_PR | TGCAACTTCAAATGCAGAGC     | PCR and sequencing |
| Exon10             | SLCO1B1_P009_PF | CAAACACTGCATGTTCCAC      | PCR                |
|                    | SLCO1B1_P009_PR | TCCATCCAAGATTACAGTGGTG   | PCR                |
|                    | SLCO1B1_P009_SF | AGCAAGGGGAGGAAGAACAT     | sequencing         |
|                    | SLCO1B1_P009_SR | TTTCTCTAAGCCTTACTTTTCCCA | sequencing         |
| Exon11             | SLCO1B1_P010_PF | CAGTGAGCTGAAAGGAATGTCA   | PCR                |
|                    | SLCO1B1_P010_PR | AGGAAGTGCTGACAATGGGT     | PCR                |
|                    | SLCO1B1_P010_SF | GGCAAAGATGGAGAGCGTAA     | sequencing         |
|                    | SLCO1B1_P010_SR | AGAAAAACCTGATTGTGCCCT    | sequencing         |
| Exon12             | SLCO1B1_P011_PF | GGATAATTCCTCCTCAGGGC     | PCR                |
|                    | SLCO1B1_P011_PR | TGGAATGTTATCAAATGGAGCA   | PCR                |
|                    | SLCO1B1_P011_SF | TCTGCAGAGGGTAAAAGGGA     | sequencing         |
|                    | SLCO1B1_P011_SR | TACCCTGAGAGATGCAAGGC     | sequencing         |
| Exon13             | SCLO1B1_P151_PF | GGCCATTCAACTGTGAGCTT     | PCR and sequencing |
|                    | SCLO1B1_P151_PR | TAGGCCCTTCACTCTGCCTA     | PCR and sequencing |
| Exon14             | SLCO1B1_25      | TTGGGTAGATGCAGAACAAA     | PCR and sequencing |
|                    | SLCO1B1_26      | TGACATGAGGAGAGTTTTGG     | PCR                |
| Exon15             | SLCO1B1_P014_PF | GAAGGCCAGAGGCAACTAGA     | PCR                |
|                    | SLCO1B1_P014_PR | GTGGGAAAGCTGCAAAGAA      | PCR                |

**Supplementary Methods Table 1a (continued)**

|                  |                          |            |
|------------------|--------------------------|------------|
| SLCO1B1_P014_SF1 | CGTTATGCCCAATAAAAAGAA    | sequencing |
| SLCO1B1_P014_SR1 | AGCTCCTCCTTTTTAACCTCTACC | sequencing |
| SLCO1B1_P014_SF2 | GCTGGGGCAGATAGTGAAAC     | sequencing |
| SLCO1B1_P014_SR2 | GCGGCAAATGATCTAGGAAA     | sequencing |

---

**Supplementary Methods Table 1a: Oligonucleotides used for resequencing *SLCO1B1* gene**

| Exon number | Name              | Sequence                 | Usage              |
|-------------|-------------------|--------------------------|--------------------|
| Exon1       | CYP3A4ex1_PF      | CCTTGGACTCCCCAGTAACA     | PCR                |
|             | CYP3A4ex1_PR      | TCCCACCAGTGAGAGGATTC     | PCR                |
|             | CYP3A4ex1_SF      | CCAACTTCCAAGGTGGAGAA     | sequencing         |
|             | CYP3A4ex1_SR      | CACCATGCCAGCTAATTTT      | sequencing         |
| Exon2       | CYP3A4ex2_PF      | ACTGAGTGGCTGCAGTGATG     | PCR                |
|             | CYP3A4ex2_SF      | TTTTGGTGTCTCATGGTGGA     | sequencing         |
|             | CYP3A4ex2_SR      | TGTACCTTCCTGGGAACCTG     | PCR and sequencing |
| Exon3       | JF_51548DA05_F    | AACACTGTGCATTCTCTTCTGATG | PCR and sequencing |
|             | JF_51548DA05_R    | GGCTGAGACTGTCTCTGTGC     | PCR and sequencing |
| Exon4       | CYP3A4_P04_PF3    | CTACTGTCATTTCTAACCATGG   | PCR and sequencing |
|             | CYP3A4_P04_PR3    | GGACAGGATGAAGTGGACG      | PCR and sequencing |
| Exon5       | CYP3A4_P250_PF    | CAGTGGACTACCCCTTGGAA     | PCR and sequencing |
|             | CYP3A4_P250_PR    | CACCTGCTTGTCTGTCTCCA     | PCR and sequencing |
| Exon6       | CYP3A4_P501_PF    | AAGTTGCATTACCACAGCCC     | PCR and sequencing |
|             | CYP3A4_P501_PR    | CCAAGGGGTAGTCCACTGAA     | PCR and sequencing |
| Exon7       | CYP3A4ex7_SF      | TTCCTATGATGGGCTCCTTG     | PCR and sequencing |
|             | CYP3A4ex7_SR      | TTGTGACAGGGGGCTGATAG     | PCR and sequencing |
| Exon8       | CYP3A4ex8_PF      | CCCTCTGAGCACTTCCTTTG     | PCR                |
|             | CYP3A4ex8_PR      | AGGTGGCCTGATAGGGACTT     | PCR                |
|             | CYP3A4ex8_SF      | AAGGCAAAGAGATTAGGGCA     | sequencing         |
|             | CYP3A4ex8_SR      | CAAACCCCACTTTCTGCATT     | sequencing         |
| Exon9       | CYP3A4ex9_PF      | AATGCAGAAAGTGGGGTTTG     | PCR                |
|             | CYP3A4ex9_PR      | TCAGAGGTTTTCCCCACAAG     | PCR                |
|             | CYP3A4ex9_SF      | AAGTCCCTATCAGGCCACCT     | sequencing         |
|             | CYP3A4ex9_SR      | AGGCTGAGAATTGGCATTG      | sequencing         |
| Exon10      | CYP3A4ex10_SF     | GACCTTGGGGAAAACCTGGAT    | PCR and sequencing |
|             | CYP3A4ex10_SR     | CAGAGCCAGCACGTTTTTACA    | PCR and sequencing |
| Exon11      | JF_50694BF05_F    | CTTCCCGAATGCTTCCAC       | PCR                |
|             | JF_50694BF05_R    | GGCAGAATATGCTTGAACCAGG   | PCR                |
|             | JF_50694BF05_I_F  | GCTTCCCACCTTCATAACT      | sequencing         |
|             | JF_50694BF05_I_R  | GCTTGAACCAGGCTGGTTCAGG   | sequencing         |
| Exon12      | JF_50928BC05_F    | GTGGACACATCACCACCCTG     | PCR and sequencing |
|             | JF_50928BC05_R    | GCCTAATTGATTCTTTGGCCC    | PCR and sequencing |
| Exon13      | JF_50694BG05_F    | TGCTCTCACTGTCCAATCTTCAC  | PCR                |
|             | JF_50694BG05_R    | TCACACTGATTTGGTCACCTCC   | PCR                |
|             | JF_50694BG05_I_F  | GTCCAATCTTCACACATCTTATA  | sequencing         |
|             | JF_50694BG05_I_R  | TTGGTCACCTCCTTTATATTCC   | sequencing         |
|             | 1576_P010_SF1     | GTCCCCTCAACACTGAAGGA     | PCR and sequencing |
|             | 1576_P010_PR      | GCCAGGCTTGTCTTGAACCTC    | PCR                |
|             | 1576_P010_SR1     | TAGGATTACAGGCGTGAGCC     | sequencing         |
|             | 1576_P010_SF2     | CTGTGCCTGAGAACACCAGA     | sequencing         |
|             | 1576_P010_SR2     | TAGGATTACAGGCGTGAGCC     | sequencing         |
|             | CYP3A4_P204_PF    | ATGAAAGGAGATGGGCTGAA     | PCR and sequencing |
|             | CYP3A4_P204_PR    | CACGGGACTATTTCCACCAC     | PCR and sequencing |
|             | CYP3A4_ex13fin_PF | AATCCACTGTGACTTTGCC      | PCR and sequencing |
|             | CYP3A4_ex13fin_PR | CATGTGGGTTCTCCATACCC     | PCR and sequencing |

**Supplementary Methods Table 1b: Oligonucleotides used for resequencing *CYP3A4* gene**

## Supplementary Appendix References

1. Morimoto K, Oishi T, Ueda S, Ueda M, Hosokawa M, Chiba K. A novel variant allele of OATP-C (SLCO1B1) found in a Japanese patient with pravastatin-induced myopathy. *Drug Metab Pharmacokinet* 2004; 19:453-5.
2. Morimoto K, Ueda S, Seki N, Igawa Y, Kameyama Y, Shimizu A, et al. OATP-C(OATP01B1)\*15 is associated with statin-induced myopathy in hypercholesterolemic patients. *Clinical Pharmacology & Therapeutics* 2005; 77:P21-P21
3. Hermann M, Bogsrud MP, Molden E, Asberg A, Mohebi BU, Ose L, et al. Exposure of atorvastatin is unchanged but lactone and acid metabolites are increased several-fold in patients with atorvastatin-induced myopathy. *Clin Pharmacol Ther* 2006; 79:532-9.
4. Fiegenbaum M, da Silveira FR, Van der Sand CR, Van der Sand LC, Ferreira ME, Pires RC, et al. The role of common variants of ABCB1, CYP3A4, and CYP3A5 genes in lipid-lowering efficacy and safety of simvastatin treatment. *Clin Pharmacol Ther* 2005; 78:551-8.
5. Frudakis TN, Thomas MJ, Ginjupalli SN, Handelin B, Gabriel R, Gomez HJ. CYP2D6\*4 polymorphism is associated with statin-induced muscle effects. *Pharmacogenet Genomics* 2007; 17:695-707.
6. Zuccaro P, Mombelli G, Calabresi L, Baldassarre D, Palmi I, Sirtori CR. Tolerability of statins is not linked to CYP450 polymorphisms, but reduced CYP2D6 metabolism improves cholesteremic response to simvastatin and fluvastatin. *Pharmacol Res* 2007; 55:310-7.
7. Mulder AB, van Lijf HJ, Bon MA, van den Bergh FA, Touw DJ, Neef C, et al. Association of polymorphism in the cytochrome CYP2D6 and the efficacy and tolerability of simvastatin. *Clin Pharmacol Ther* 2001; 70:546-51.
8. Oh J, Ban MR, Miskie BA, Pollex RL, Hegele RA. Genetic determinants of statin intolerance. *Lipids Health Dis* 2007; 6:7
9. Vladutiu GD, Simmons Z, Isackson PJ, Tarnopolsky M, Peltier WL, Barboi AC, et al. Genetic risk factors associated with lipid-lowering drug-induced myopathies. *Muscle Nerve* 2006; 34:153-62.
10. Ruano G, Thompson PD, Windemuth A, Seip RL, Dande A, Sorokin A, et al. Physiogenomic association of statin-related myalgia to serotonin receptors. *Muscle Nerve* 2007; 36:329-35.
11. Kameyama Y, Yamashita K, Kobayashi K, Hosokawa M, Chiba K. Functional characterization of SLCO1B1 (OATP-C) variants, SLCO1B1\*5, SLCO1B1\*15 and SLCO1B1\*15+C1007G, by using transient expression systems of HeLa and HEK293 cells. *Pharmacogenet Genomics* 2005; 15:513-22.
12. Nishizato Y, Ieiri I, Suzuki H, Kimura M, Kawabata K, Hirota T, et al. Polymorphisms of OATP-C (SLC21A6) and OAT3 (SLC22A8) genes: consequences for pravastatin pharmacokinetics. *Clin Pharmacol Ther* 2003; 73:554-65.
13. Maeda K, Ieiri I, Yasuda K, Fujino A, Fujiwara H, Otsubo K, et al. Effects of organic anion transporting polypeptide 1B1 haplotype on pharmacokinetics of pravastatin, valsartan, and temocapril. *Clin Pharmacol Ther* 2006; 79:427-39.

14. Pasanen MK, Fredrikson H, Neuvonen PJ, Niemi M. Different effects of SLCO1B1 polymorphism on the pharmacokinetics of atorvastatin and rosuvastatin. *Clin Pharmacol Ther* 2007; 82:726-33.
15. Lee E, Ryan S, Birmingham B, Zalikowski J, March R, Ambrose H, et al. Rosuvastatin pharmacokinetics and pharmacogenetics in white and Asian subjects residing in the same environment. *Clin Pharmacol Ther* 2005; 78:330-41.
16. Chung JY, Cho JY, Yu KS, Kim JR, Oh DS, Jung HR, et al. Effect of OATP1B1 (SLCO1B1) variant alleles on the pharmacokinetics of pitavastatin in healthy volunteers. *Clin Pharmacol Ther* 2005; 78:342-50.
17. Niemi M, Schaeffeler E, Lang T, Fromm MF, Neuvonen M, Kyrklund C, et al. High plasma pravastatin concentrations are associated with single nucleotide polymorphisms and haplotypes of organic anion transporting polypeptide-C (OATP-C, SLCO1B1). *Pharmacogenetics* 2004; 14:429-40.
18. Niemi M, Pasanen MK, Neuvonen PJ. SLCO1B1 polymorphism and sex affect the pharmacokinetics of pravastatin but not fluvastatin. *Clin Pharmacol Ther* 2006; 80:356-66.
19. Mwinyi J, Johne A, Bauer S, Roots I, Gerloff T. Evidence for inverse effects of OATP-C (SLC21A6) 5 and 1b haplotypes on pravastatin kinetics. *Clin Pharmacol Ther* 2004; 75:415-21.
20. Pasanen MK, Neuvonen M, Neuvonen PJ, Niemi M. SLCO1B1 polymorphism markedly affects the pharmacokinetics of simvastatin acid. *Pharmacogenet Genomics* 2006; 16:873-9.
21. Tachibana-limori R, Tabara Y, Kusuhara H, Kohara K, Kawamoto R, Nakura J, et al. Effect of genetic polymorphism of OATP-C (SLCO1B1) on lipid-lowering response to HMG-CoA reductase inhibitors. *Drug Metab Pharmacokinet* 2004; 19:375-80.
22. Becquemont L, Neuvonen M, Verstuyft C, Jaillon P, Letierce A, Neuvonen PJ, et al. Amiodarone interacts with simvastatin but not with pravastatin disposition kinetics. *Clin Pharmacol Ther* 2007; 81:679-84.
23. Ohyama K, Nakajima M, Nakamura S, Shimada N, Yamazaki H, Yokoi T. A significant role of human cytochrome P450 2C8 in amiodarone N-deethylation: an approach to predict the contribution with relative activity factor. *Drug Metab Dispos* 2000; 28:1303-10.
24. Kajinami K, Brousseau ME, Ordovas JM, Schaefer EJ. CYP3A4 genotypes and plasma lipoprotein levels before and after treatment with atorvastatin in primary hypercholesterolemia. *Am J Cardiol* 2004; 93:104-7.
25. Kivisto KT, Niemi M, Schaeffeler E, Pitkala K, Tilvis R, Fromm MF, et al. Lipid-lowering response to statins is affected by CYP3A5 polymorphism. *Pharmacogenetics* 2004; 14:523-5.
26. Ruano G, Thompson PD, Windemuth A, Smith A, Kocherla M, Holford TR, et al. Physiogenomic analysis links serum creatine kinase activities during statin therapy to vascular smooth muscle homeostasis. *Pharmacogenomics* 2005; 6:865-72.
27. Sei Y, Sambuughin NN, Davis EJ, Sachs D, Cuenca PB, Brandom BW, et al. Malignant

hyperthermia in North America: genetic screening of the three hot spots in the type I ryanodine receptor gene. *Anesthesiology* 2004; 101:824-30.

28. Stirling WD. Enhancements to aid interpretation of probability plots. *The Statistician* 1982; 31:211-20.
29. Wellcome Trust Case Control Consortium. Genome-wide association study of 14,000 cases of seven common diseases and 3,000 shared controls. *Nature* 2007; 447:661-78.
30. Devlin B, Roeder K. Genomic control for association studies. *Biometrics* 1999; 55:997-1004.
31. Kaplan EL, Meier P. Nonparametric estimation from incomplete observations. *Journal of the American Statistical Association* 1958; 53:457-481.
32. Barrett JC, Cardon LR. Evaluating coverage of genome-wide association studies. *Nat Genet* 2006; 38:659-62.
